1 **Correlative cryogenic montage electron tomography for comprehensive in-situ**  
2 **whole-cell structural studies**

3

4 Jie E. Yang<sup>1,2,3</sup>, Matthew R. Larson<sup>1,2,3,#</sup>, Bryan S. Sibert<sup>1,2,3,#</sup>, Joseph Y. Kim<sup>1,4,#</sup>, Daniel  
5 Parrell<sup>1</sup>, Juan C. Sanchez<sup>1,5</sup>, Victoria Pappas<sup>1,5</sup>, Anil Kumar<sup>1,2,3</sup>, Kai Cai<sup>1,2,3</sup>, Keith  
6 Thompson<sup>1,2,3</sup>, Elizabeth R. Wright<sup>1,2,3,6,\*</sup>

7

8 <sup>1</sup>Department of Biochemistry, University of Wisconsin, Madison, WI USA

9 <sup>2</sup>Cryo-Electron Microscopy Research Center, Department of Biochemistry, University of  
10 Wisconsin, Madison, WI USA

11 <sup>3</sup>Midwest Center for Cryo-Electron Tomography, Department of Biochemistry, University  
12 of Wisconsin, Madison, WI USA

13 <sup>4</sup>Department of Chemistry, University of Wisconsin, Madison, WI USA

14 <sup>5</sup>Biophysics Graduate Program, University of Wisconsin, Madison, WI USA

15 <sup>6</sup>Morgridge Institute for Research, Madison, WI, USA

16 #These authors contributed equally

17 \*To whom correspondence should be addressed.

18 E-mail: [erwright2@wisc.edu](mailto:erwright2@wisc.edu); Tel.: (+1) 608-265-0666; Fax: (+1) 608-265-4693

19 **Abstract**

20 **Imaging large fields of view while preserving high-resolution structural information**  
21 **remains a challenge in low-dose cryo-electron tomography. Here, we present**  
22 **robust tools for montage electron tomography tailored for vitrified specimens. The**  
23 **integration of correlative cryo-fluorescence microscopy, focused-ion beam milling,**  
24 **and micropatterning produces contextual three-dimensional architecture of cells.**  
25 **Montage tilt series may be processed in their entirety or as individual tiles suitable**  
26 **for sub-tomogram averaging, enabling efficient data processing and analysis.**

27

28 **Main**

29 There is an increasing interest and need for a comprehensive understanding of the  
30 structure and function of macromolecules, both isolated and within the context of a larger  
31 biological system. While cryo-electron microscopy (cryo-EM) of purified proteins (e.g.,  
32 single-particle cryo-EM) has propelled the cryo-EM ‘resolution revolution’<sup>1</sup>, *ex-situ*  
33 conditions may not capture cellular interactions taking place between biological molecules  
34 in a native context. Cryo-electron tomography (cryo-ET) links three-dimensional (3D)  
35 contextual visualization and high-resolution structure determination of cryogenically  
36 preserved macromolecular complexes in their native cellular environment<sup>2</sup>, unperturbed  
37 by purification or chemical fixation and staining<sup>3,4</sup>. Computationally extracted sub-  
38 tomograms can be analyzed and classified to reveal sub-nanometer (sub-5 Å) to  
39 nanometer (1~3 nm) resolution structures of *in-situ* complexes<sup>5</sup>. Cryo-ET is generally  
40 restricted to investigations of small specimen volumes and the thin peripheral areas of  
41 cells (< 500 nm) that are penetrable by the electron beam. To explore thicker regions of

42 cells, sample thinning technologies have evolved and include cryo-electron microscopy  
43 of vitreous sections (CEMOVIS)<sup>6</sup> and cryo-focused ion beam (cryo-FIB) milling<sup>7</sup>. Both  
44 methods produce thin sections or lamella from bulk materials, but each may be impacted  
45 by preparative artifacts such as sample compression or curtaining, respectively. Cryo-  
46 correlative light and electron microscopy (cryo-CLEM)<sup>8</sup> correlates the temporal and  
47 spatial information from fluorescence light microscopy (FLM), with ultrastructural data  
48 from cryo-ET of the same region of interest (ROI) while retaining context. In combination  
49 with cryo-FIB milling, it is now possible to pinpoint an area of interest deep in the interior  
50 of a specimen through 3D correlative cryo-FLM-FIB-ET<sup>9</sup>. However, it remains challenging  
51 to bridge the disparity of the spatial scales in multi-modal microscopy pipelines where the  
52 field of view (FOV) in wide-field FLM can be  $10^5$  times ( $\sim 0.1$  to  $5$  mm) that of an EM FOV  
53 ( $\sim 200$  nm to  $800$   $\mu\text{m}$ )<sup>2,10</sup>.

54

55 In cryo-ET, tilt series acquisition of an ROI involves tilting the cryo-preserved specimen  
56 along one or two axes<sup>11</sup> while a series of projection images is incrementally captured on  
57 a detector. Tilt series of the same region could be collected at both high and low  
58 magnifications for subsequent reconstruction into 3D tomograms to obtain high-resolution  
59 structural information<sup>12</sup> and overall landscape visualization, respectively. However, this  
60 could be difficult to implement due to the radiation sensitivity of frozen-hydrated biological  
61 materials and the need to use low-dose exposure routines ( $\sim 1$ - $3$   $\text{e}^-/\text{\AA}^2/\text{tilt}$ ) that must  
62 maintain sufficient signal over background noise at each tilted image to support individual  
63 frame, image, and tilt series alignment. Advances in detector design have supported the  
64 use of larger format detectors for certain applications<sup>13</sup>. Of note, detector size scales

65 exponentially with the volume of the data being digitized, thus imposing challenges to  
66 hardware and software infrastructure<sup>14</sup>. These technical hurdles and others<sup>5</sup> have  
67 constrained the application of cryo-ET to fractional volumes of cells that result in  
68 significant losses to the FOV and contextual information. An approach for obtaining 3D  
69 tomograms that encompass a larger FOV is to collect montages of tilt series. The  
70 development of montage cryo-ET has been limited. To our knowledge, only one method<sup>15</sup>  
71 has been reported. As noted by the authors, major challenges included seamlessly joining  
72 cryo-EM montage tiles with improved automation<sup>15</sup>, processing large volume stitched  
73 tomograms<sup>16</sup>, and sub-tomogram averaging (STA).

74

75 Here, we demonstrate our adaptation of the principles of montage tomography, which  
76 is routinely applied to resin-embedded samples<sup>17,18</sup>, to frozen-hydrated specimens via  
77 montage cryo-ET. This montage cryo-ET data collection routine and automated  
78 processing schemes (Supplementary Fig. 1) are robust solutions for the generation of  
79 molecular-level resolution 3D reconstructions of vitrified specimens.

80

81 We employed image-shift montage acquisition<sup>17,19</sup> to acquire overlapping tiles of  
82 defined size at each tilt increment. Rectangular or square montage tile patterns and tile  
83 overlaps were investigated while considering: 1) Fresnel fringes formed inside the image  
84 detector FOV from the C2 aperture of an electron microscope<sup>20</sup> introduce non-uniform  
85 illumination and disruption in image signals (Supplementary Fig. 2a). Under a  
86 magnification ( $4.6 \text{ \AA}/\text{pixel}$ ) and defocus value ( $-5 \mu\text{m}$ ) typical for cryo-ET collection, the  
87 beam fringe artifact was determined to affect up to 3 to 4% of the FOV extending from the

88 outer edge of the 3.11  $\mu\text{m}$  illuminated area (Supplementary Fig. 2b) when the outer edge  
89 of the beam intersected the camera at  $\sim 4\%$  of its long axis. 2) Under parallel illumination,  
90 the beam size relative to the camera frame determines the captured FOV and fringe-  
91 unimpacted or ‘fringeless’ area (Supplementary Fig. 2c-d). The FOV affected by Fresnel  
92 fringes becomes increasingly evident as the beam size decreases under a constant  
93 magnification and defocus (Supplementary Fig. 2d-e). Yet, use of an expanded beam and  
94 larger illuminated areas to minimizing in-frame fringes also impacts the sample through  
95 excess pre-exposure irradiation (Supplementary Fig. 2c). 3) Robust automation of  
96 montage stitching at each tilt requires consistent overlap regions between adjacent tiles.  
97 Compared to resin-embedded samples where the image contrast is strong<sup>18</sup>, reliable tile  
98 overlaps at a majority of the tilts are essential in vitrified unstained samples to achieve  
99 gap-free stitching<sup>15</sup>. 4) Sorting of individual tile tilt series from the complete montage  
100 collection for efficient data processing and sub-tomogram averaging is applicable only  
101 when each tile frame contains enough fringe-unimpacted FOV and retains the ROI  
102 throughout the tilt series.

103

104 An inherent limitation of montage cryo-ET is the uneven accumulation of dose in  
105 overlapping regions between adjacent tiles, which leads to excessive radiation damage.  
106 Therefore, we adopted an additional globally applied translation shift that was calculated  
107 from the central tile of a montage pattern (Supplementary Figs. 3, 4, 9a). To quantitatively  
108 assess cryo-ET data collection and montage tiling strategies, we developed  
109 TomoGrapher, a user-friendly simulation tool to visualize tilt series collection routines and  
110 determine global and localized electron dose accumulation (Supplementary Fig. 3).

111 TomoGrapher supports simulation of tilt series acquisition with and without a translational  
112 shift extending along spiral paths (Supplementary Fig. 4a-f, Table 1). The shape of the  
113 spiral trajectory can be adjusted to vary dose accumulation on each voxel over the full tilt  
114 range. Circular beam projections and the associated images gradually elongate to  
115 ellipses along the X-axis perpendicular to the tilt axis (Y-axis) as the tilt angle increases  
116 (Supplementary Figs. 3b, 4c-d), resulting in stretching of the spiral paths. Optional X-axial  
117 correction and cosine-weighting<sup>21</sup> of dose can be implemented in the simulation process  
118 (Supplementary Fig. 3). Within the maximum offset distance permitted to retain the FOV  
119 in the full tilt range, simulation results suggest larger translations and axial correction  
120 introduce more uniformly spread dose (Supplementary Fig. 4g-h).

121

122 Overall, both simulation results and experimental data demonstrate the incorporation  
123 of a global translational shift allowed for a more even distribution of the total electron dose  
124 across each montage tile and tile overlap regions where accumulated dose would  
125 otherwise be much higher (Supplementary Fig. 4, Table 1). We determined that a 15 to  
126 20% overlap in X (fringe-affected axis) and 10% in Y (fringe-unaffected axis) of tile frames  
127 was sufficient for automated gap-free tile stitching without human intervention at tilt angles  
128 up to  $\pm 39^\circ$  and minimal manual fixation at higher tilt angles ( $\pm 40^\circ$  to  $60^\circ$ ) using  
129 coordinate-based image cross-correlation<sup>22</sup> (Supplementary Figs. 5a-c). We explored the  
130 addition of rotation to translation of the tile montage pattern to further spread the dose.  
131 Our data (Supplementary Fig. 5d) support a common observation that rotation of the in-  
132 plane image shift deviates significantly from the designated coordinates as the stage tilt  
133 increases<sup>23</sup>. This departure in image shift values introduced by global tile rotation was

134 much larger than the applied translation alone at lower tilts and became particularly  
135 irregular as the stage was tilted to degrees greater than  $\pm 30^\circ$ . As a result, the inconsistent  
136 overlap between tiles caused problematic stitching, consistent with previous reports<sup>15,18</sup>.

137

138 We integrated montage cryo-ET with 2D and 3D correlative cryo-CLEM and cryo-FIB  
139 routines using CorRelator<sup>24</sup>, 3DCT<sup>9</sup>, and SerialEM<sup>19</sup> to image large, targeted FOV along  
140 the periphery of HeLa cells (Supplementary Fig. 6) and cryo-FIB-milled lamella near the  
141 nucleus of adenocarcinomic human alveolar basal epithelial (A549) cells (Fig. 1,  
142 Supplementary Fig. 7). Both cell lines are commonly used for studies of both  
143 mitochondrial function and respiratory syncytial virus (RSV) infection<sup>25,26</sup>. A pixel size of  
144 4.6 Å was used to support the large FOV and STA sampling requirements<sup>12</sup>. 2D cryo-  
145 CLEM was applied to identify fields of long, filamentous RSV particles budding from  
146 metabolically active RSV-infected HeLa cells<sup>26</sup> for montage cryo-ET data collection  
147 (Supplementary Fig. 6). Montage tomograms of RSV particles up to 8  $\mu\text{m}$  in length  
148 revealed the ultrastructure of intact virions and organization of viral compartments  
149 (Supplementary Fig. 6g). To explore mitochondrial function and organization closer to the  
150 nucleus in naïve and RSV-infected A549 cells, we coupled 3D targeted cryo-FLM-FIB-  
151 milling with montage cryo-ET (Fig. 1, Supplementary Fig. 7). Low toxicity fluorescent  
152 nanoparticles (40 nm)<sup>27</sup> were internalized by the cells and used as FIB-milling “fiducials”  
153 to position and adjust milling boxes on-the-fly in the Z and XY planes based on the  
154 position of nanoparticles relative to the ROI in the 3D cryo-FLM Z-stack (Supplementary  
155 Figs. 7, 8b-c). A square of interest was identified (Fig. 1a) and milling boxes were initially  
156 positioned via external markers using 3DCT<sup>9</sup> and CorRelator<sup>24</sup> (Fig. 1b, Supplementary

157 Fig. 8c), then further adjusted based on the FIB-milling “fiducials” (Supplementary Fig.  
158 8d-f) during the thinning process. Uniformly-sized nanoparticles can be readily  
159 differentiated from electron dense lipid droplets by SEM and cryo-ET (Fig. 1c,  
160 Supplementary Fig. 8j-m). Post correlation<sup>28</sup> of cryo-EM images of lamella with the  
161 corresponding pre-milling cryo-FLM section confirmed the locations of ROIs and  
162 nanoparticles (Fig. 1d-f, Supplementary Fig. 8h-i). We targeted fluorescently-labeled  
163 mitochondria-rich areas near the nucleus where multiple 3X3 montage cryo-ET fields  
164 were collected; each montage covering an area of  $\sim 7 \times 5.5 \mu m$  (representative 3X3  
165 montage tile in cyan box, Fig. 1e). The 3D correlative targeting in combination with  
166 montage cryo-ET supported the precise acquisition of large FOVs of a FIB-thinned  
167 cellular lamella. Within the 3D volume, the arrangement of mitochondria, the Golgi, rough  
168 ER, and nuclear pore complex along the nuclear envelope was observed with potential  
169 to retrieve high-resolution structural information<sup>12</sup> (Fig. 1f).

170

171 Next, we applied montage cryo-ET to primary neurons grown on micropatterned cryo-  
172 TEM grids<sup>29,30</sup>. Coupling micropatterning with cryo-ET has proven to be valuable for  
173 directing cytoskeleton organization and understanding neural outgrowth<sup>30</sup>. Straight-line  
174 patterns were used to control neurite growth of primary *Drosophila melanogaster* neurons  
175 (Fig. 2a-c). Multiple montage tilt series were collected along neurites protruding from  
176 peripheral areas of the cell body (representative 3X4 montage site ( $\sim 8 \times 7 \mu m$ ) delineated  
177 in Fig. 2d). The montage cryo-tomogram revealed the architecture of the cytoskeleton,  
178 including continuous microtubules ( $\sim 9 \mu m$ ) stretching along the pattern and the presence  
179 of actin filaments extending from the neurite. The localization and 3D organization of



180 mitochondria that exhibited matrix regions densely packed with calcium granules was  
181 indicative of possible metabolic activities<sup>31</sup> (Fig. 2e-f). The application of cryo-montage  
182 tomography is important for generating large-scale 3D molecular vistas of neurons and  
183 other cells that are responding to external physical cues such as those imposed by  
184 micropatterning.

185

186 A completely reconstructed unbinned tomogram of a fully stitched 3X4 montage tilt  
187 series could be ~700 GB or more, particularly as the sampling pixel size decreases and  
188 tile pattern size expands. To maximize output and develop efficient processing schemes,  
189 we explored sorting individual tile tilt series and independently reconstructing them into  
190 tile tomograms that have the same volume and pixel size as a regular single cryo-  
191 tomogram. Consistent with simulation results (Supplementary Figs. 4, 5), each tile tilt  
192 series exhibited the same spiral image shift trajectory as the fully-stitched montage tilt  
193 series (Supplementary Fig. 9a-b). When the largest image translation offset was restricted  
194 to 30% or less of the FOV per image, each tile tilt series maintained the specified ROI  
195 within the majority of the tilt series images. After determining the eucentric plane of the  
196 montage field, per tilt focus and per group tracking were adjusted using the nearby focus  
197 area during the dose-symmetric acquisition. CTF determination using CTFPLOTTER<sup>32</sup>  
198 indicated that the data acquisition scheme provided a relatively stable defocus ( $\pm 1 \mu m$ )  
199 over tilt series acquired from a wide range of samples (Supplementary Fig. 9c). We used  
200 CTFIND4 for tilted defocus determination<sup>23</sup>. CTFIND4 reported the high-resolution limit  
201 of detected Thon rings that ranged from 8 to 20 Å for individual tiles and stitched montages  
202 at 0° tilt and high tilts (Supplementary Fig. 9d). Per tile defocus adjustment could be

203 implemented to decrease defocus variation. We performed sub-tomogram averaging on  
204 the RSV F fusion (F) glycoprotein to compare with our previous results<sup>33</sup>. Viral F  
205 glycoproteins are arrayed on the surface of filamentous RSV particles either budding or  
206 released from RSV-infected BEAS-2B cells grown on EM grids (Supplementary Fig. 10a-  
207 e). Volumes containing F were extracted from individually-reconstructed tile tomograms  
208 for STA (n = 23250, ~29 Å, C3 symmetry imposed). In an effort to determine whether an  
209 improved sub-tomogram average would result from the removal of particles located along  
210 stitched overlap zones (15% of X and 10% of Y edges), 971 particles from those regions  
211 out of the 7947 total unique particles were removed to yield a refined average of F at ~26  
212 Å resolution (n = 20707, C3 symmetry imposed). These averaged F structures were on  
213 par with what has been reported<sup>33</sup>. We anticipate further improvements to the average  
214 could be gained, in part, by using a lower defocus range, a larger number of particles,  
215 and further refinement of particles included in the average based upon position in  
216 individual tile tomograms.

217

218 In conclusion, correlative cryo-montage tomography is a workflow suited for capturing  
219 both comprehensive fields of view and targeted regions of interest in complex biological  
220 environments at molecular-level resolution. The montage cryo-ET tools presented here  
221 are applicable for modern TEMs with stable lens systems. Montage cryo-ET is adaptable  
222 to existing imaging routines and supports flexible user-defined tile patterns, streamlined  
223 data acquisition, pre-processing automation, and maximization of cryo-ET output with  
224 both individual tile and montage tilt series. Rectangular array tile montage for cryo-ET has  
225 laid the foundation for future developments with super-montage tomography that

226 incorporate both image-shift and stage-shift collection<sup>17</sup>. Cryo-ET tilt series are commonly  
227 acquired at the highest tolerable dose for the biological target; future work will assess the  
228 impact of total dose, dose distribution, and montage tile stitching on the preservation of  
229 high-resolution structural information for both montage and individual tile tomograms.  
230 Ultimately, montage tomography solutions will help bridge the resolution gap and field of  
231 view losses present between multi-modal microscopy imaging pipelines.

232

233 **Acknowledgements.** We thank Dr. Jill Wildonger, Dr. Sihui Z. Yang, and Mrs. Josephine  
234 W. Mitchell in the Department of Biochemistry, University of Wisconsin, Madison for kindly  
235 sharing the elav-Gal4, UAS-CD8 : GFP fly strain (Bloomington stock center, #5146). This  
236 work was supported in part by the University of Wisconsin, Madison, the Department of  
237 Biochemistry at the University of Wisconsin, Madison, and public health service grants  
238 R01 GM114561 and U24 GM139168 to E.R.W. from the NIH. We are grateful for the use  
239 of facilities and instrumentation at the Cryo-EM Research Center in the Department of  
240 Biochemistry at the University of Wisconsin, Madison.

241

242 **Author contributions.** J.E.Y. and E.R.W. conceived and designed the study. M.R.L.,  
243 J.E.Y, E.R.W developed TomoGrapher and pre-processing workflow. J.E.Y., B.S.S,  
244 J.Y.K., D.P., J.M.S., V.P., A.K., K.C., A.K., K.T. prepared the samples, performed the  
245 experiments, and data processing. J.E.Y. and E.R.W. wrote the manuscript, with  
246 contributions from all authors. All authors read and approved the manuscript.

247

248 **Competing Interests.** The funders had no role in study design, data collection and  
249 interpretation, or the decision to submit the work for publication. The authors declare no  
250 competing financial or non-financial interests.

## 251 References

- 252
- 253 1 Kühlbrandt, W. The Resolution Revolution. *Science* **343**, 1443-1444,  
254 doi:10.1126/science.1251652 (2014).
- 255 2 Turk, M. & Baumeister, W. The promise and the challenges of cryo-electron tomography.  
256 *FEBS Letters* **594**, 3243-3261, doi:<https://doi.org/10.1002/1873-3468.13948> (2020).
- 257 3 Thompson, R. F., Walker, M., Siebert, C. A., Muench, S. P. & Ranson, N. A. An introduction  
258 to sample preparation and imaging by cryo-electron microscopy for structural biology.  
259 *Methods* **100**, 3-15, doi:10.1016/j.ymeth.2016.02.017 (2016).
- 260 4 Kiss, G. *et al.* Structural analysis of respiratory syncytial virus reveals the position of M2-1  
261 between the matrix protein and the ribonucleoprotein complex. *J Virol* **88**, 7602-7617,  
262 doi:10.1128/jvi.00256-14 (2014).
- 263 5 Schur, F. K. M. Toward high-resolution in situ structural biology with cryo-electron  
264 tomography and subtomogram averaging. *Curr. Opin. Struct. Biol.* **58**, 1-9,  
265 doi:<https://doi.org/10.1016/j.sbi.2019.03.018> (2019).
- 266 6 Al-Amoudi, A. *et al.* Cryo-electron microscopy of vitreous sections. *EMBO J* **23**, 3583-3588,  
267 doi:10.1038/sj.emboj.7600366 (2004).
- 268 7 Rigort, A. *et al.* Micromachining tools and correlative approaches for cellular cryo-  
269 electron tomography. *J. Struct. Biol.* **172**, 169-179,  
270 doi:<https://doi.org/10.1016/j.jsb.2010.02.011> (2010).
- 271 8 Hampton, C. M. *et al.* Correlated fluorescence microscopy and cryo-electron tomography  
272 of virus-infected or transfected mammalian cells. *Nat. Protoc.* **12**, 150-167,  
273 doi:10.1038/nprot.2016.168 (2017).
- 274 9 Arnold, J. *et al.* Site-Specific Cryo-focused Ion Beam Sample Preparation Guided by 3D  
275 Correlative Microscopy. *Biophys. J.* **110**, 860-869,  
276 doi:<https://doi.org/10.1016/j.bpj.2015.10.053> (2016).
- 277 10 Phan, S., Terada, M. & Lawrence, A. Serial reconstruction and montaging from large-field  
278 electron microscope tomograms. *Annu Int Conf IEEE Eng Med Biol Soc* **2009**, 5772-5776,  
279 doi:10.1109/IEMBS.2009.5332531 (2009).
- 280 11 Iancu, C. V. *et al.* A “flip-flop” rotation stage for routine dual-axis electron  
281 cryotomography. *J. Struct. Biol.* **151**, 288-297,  
282 doi:<https://doi.org/10.1016/j.jsb.2005.07.004> (2005).
- 283 12 Shannon, C. E. Communication in the Presence of Noise. *Proceedings of the IRE* **37**, 10-21,  
284 doi:10.1109/JRPROC.1949.232969 (1949).
- 285 13 Faruqi, A. R. & McMullan, G. Direct imaging detectors for electron microscopy. *Nuclear*  
286 *Instruments and Methods in Physics Research Section A: Accelerators, Spectrometers,*  
287 *Detectors and Associated Equipment* **878**, 180-190,  
288 doi:<https://doi.org/10.1016/j.nima.2017.07.037> (2018).
- 289 14 Baldwin, P. R. *et al.* Big data in cryoEM: automated collection, processing and accessibility  
290 of EM data. *Current Opinion in Microbiology* **43**, 1-8, doi:10.1016/j.mib.2017.10.005  
291 (2018).
- 292 15 Peck, A. *et al.* Montage electron tomography of vitrified specimens. *bioRxiv*,  
293 2021.2011.2002.466666, doi:10.1101/2021.11.02.466666 (2021).

- 294 16 Chen, R. *et al.* EPIK-a Workflow for Electron Tomography in Kepler. *Procedia Comput Sci*  
295 **20**, 2295-2305, doi:10.1016/j.procs.2014.05.214 (2014).
- 296 17 Mastronarde, D. N., van der Heide, P. A., Morgan, G. P. & Marsh, B. J. Supermontaging:  
297 Reconstructing Large Cellular Volumes by Stitching Together Laterally Adjacent  
298 Tomograms. *Microsc Microanal.* **14**, 106-107, doi:10.1017/S1431927608086820 (2008).
- 299 18 Phan, S. *et al.* TxBR montage reconstruction for large field electron tomography. *J. Struct.*  
300 *Biol.* **180**, 154-164, doi:https://doi.org/10.1016/j.jsb.2012.06.006 (2012).
- 301 19 Mastronarde, D. N. Automated electron microscope tomography using robust prediction  
302 of specimen movements. *J. Struct. Biol.* **152**, 36-51, doi:10.1016/j.jsb.2005.07.007 (2005).
- 303 20 Fukushima, K., Kawakatsu, H. & Fukami, A. Fresnel fringes in electron microscope images.  
304 *Journal of Physics D: Applied Physics* **7**, 257-266, doi:10.1088/0022-3727/7/2/310 (1974).
- 305 21 Cope, J., Heumann, J. & Hoenger, A. Cryo-electron tomography for structural  
306 characterization of macromolecular complexes. *Curr Protoc Protein Sci* **Chapter 17**,  
307 Unit17.13-Unit17.13, doi:10.1002/0471140864.ps1713s65 (2011).
- 308 22 Kremer, J. R., Mastronarde, D. N. & McIntosh, J. R. Computer Visualization of Three-  
309 Dimensional Image Data Using IMOD. *J. Struct. Biol.* **116**, 71-76,  
310 doi:https://doi.org/10.1006/jsbi.1996.0013 (1996).
- 311 23 Bouvette, J. *et al.* Beam image-shift accelerated data acquisition for near-atomic  
312 resolution single-particle cryo-electron tomography. *Nat. Commun.* **12**, 1957,  
313 doi:10.1038/s41467-021-22251-8 (2021).
- 314 24 Yang, J. E., Larson, M. R., Sibert, B. S., Shrum, S. & Wright, E. R. CorRelator: Interactive  
315 software for real-time high precision cryo-correlative light and electron microscopy. *J*  
316 *Struct Biol*, 107709, doi:10.1016/j.jsb.2021.107709 (2021).
- 317 25 Hu, M. *et al.* Respiratory syncytial virus co-opts host mitochondrial function to favour  
318 infectious virus production. *eLife* **8**, e42448, doi:10.7554/eLife.42448 (2019).
- 319 26 Ke, Z. *et al.* The Morphology and Assembly of Respiratory Syncytial Virus Revealed by  
320 Cryo-Electron Tomography. *Viruses* **10**, doi:10.3390/v10080446 (2018).
- 321 27 Bahadar, H., Maqbool, F., Niaz, K. & Abdollahi, M. Toxicity of Nanoparticles and an  
322 Overview of Current Experimental Models. *Iran Biomed J* **20**, 1-11,  
323 doi:10.7508/ibj.2016.01.001 (2016).
- 324 28 Klein, S. *et al.* Post-correlation on-lamella cryo-CLEM reveals the membrane architecture  
325 of lamellar bodies. *Communications Biology* **4**, 137, doi:10.1038/s42003-020-01567-z  
326 (2021).
- 327 29 Toro-Nahuelpan, M. *et al.* Tailoring cryo-electron microscopy grids by photo-  
328 micropatterning for in-cell structural studies. *Nat. Methods* **17**, 50-54,  
329 doi:10.1038/s41592-019-0630-5 (2020).
- 330 30 Sibert, B. S., Kim, J. Y., Yang, J. E. & Wright, E. R. Micropatterning Transmission Electron  
331 Microscopy Grids to Direct Cell Positioning within Whole-Cell Cryo-Electron Tomography  
332 Workflows. *JoVE*, e62992, doi:doi:10.3791/62992 (2021).
- 333 31 Wolf, S. G. *et al.* 3D visualization of mitochondrial solid-phase calcium stores in whole  
334 cells. *eLife* **6**, e29929, doi:10.7554/eLife.29929 (2017).
- 335 32 Xiong, Q., Morphew, M. K., Schwartz, C. L., Hoenger, A. H. & Mastronarde, D. N. CTF  
336 determination and correction for low dose tomographic tilt series. *J. Struct. Biol.* **168**, 378-  
337 387, doi:10.1016/j.jsb.2009.08.016 (2009).

338 33 Stobart, C. C. *et al.* A live RSV vaccine with engineered thermostability is immunogenic in  
339 cotton rats despite high attenuation. *Nat. Commun.* **7**, 13916, doi:10.1038/ncomms13916  
340 (2016).

341

## 342 **Methods section only**

343

344 34 Egger, B., van Giesen, L., Moraru, M. & Sprecher, S. G. In vitro imaging of primary neural  
345 cell culture from *Drosophila*. *Nat. Protoc.* **8**, 958-965, doi:10.1038/nprot.2013.052 (2013).

346 35 Lu, W., Lakonishok, M. & Gelfand, V. I. Kinesin-1-powered microtubule sliding initiates  
347 axonal regeneration in *Drosophila* cultured neurons. *Mol. Biol. Cell* **26**, 1296-1307,  
348 doi:10.1091/mbc.E14-10-1423 (2015).

349 36 Bieber, A., Capitanio, C., Wilfling, F., Pitzko, J. & Erdmann, P. S. Sample Preparation by  
350 3D-Correlative Focused Ion Beam Milling for High-Resolution Cryo-Electron Tomography.  
351 *JoVE*, e62886, doi:doi:10.3791/62886 (2021).

352 37 Wagner, F. R. *et al.* Preparing samples from whole cells using focused-ion-beam milling  
353 for cryo-electron tomography. *Nat. Protoc.* **15**, 2041-2070, doi:10.1038/s41596-020-  
354 0320-x (2020).

355 38 Gorelick, S. *et al.* PIE-scope, integrated cryo-correlative light and FIB/SEM microscopy.  
356 *eLife* **8**, e45919, doi:10.7554/eLife.45919 (2019).

357 39 Reisinger, T., Leufke, P. M., Gleiter, H. & Hahn, H. On the relative intensity of Poisson's  
358 spot. *New Journal of Physics* **19**, 033022, doi:10.1088/1367-2630/aa5e7f (2017).

359 40 Weis, F., Hagen, W. J. H., Schorb, M. & Mattei, S. Strategies for Optimization of Cryogenic  
360 Electron Tomography Data Acquisition. *JoVE*, e62383, doi:doi:10.3791/62383 (2021).

361 41 Zheng, S. Q. *et al.* MotionCor2: anisotropic correction of beam-induced motion for  
362 improved cryo-electron microscopy. *Nat. Methods* **14**, 331-332, doi:10.1038/nmeth.4193  
363 (2017).

364 42 Mastronarde, D. N. & Held, S. R. Automated tilt series alignment and tomographic  
365 reconstruction in IMOD. *J Struct Biol* **197**, 102-113, doi:10.1016/j.jsb.2016.07.011 (2017).

366 43 Grant, T. & Grigorieff, N. Measuring the optimal exposure for single particle cryo-EM using  
367 a 2.6 Å reconstruction of rotavirus VP6. *eLife* **4**, e06980, doi:10.7554/eLife.06980 (2015).

368 44 Moreno, J. J., Martínez-Sánchez, A., Martínez, J. A., Garzón, E. M. & Fernández, J. J.  
369 TomoEED: fast edge-enhancing denoising of tomographic volumes. *Bioinformatics* **34**,  
370 3776-3778, doi:10.1093/bioinformatics/bty435 (2018).

371 45 Chen, M. *et al.* Convolutional neural networks for automated annotation of cellular cryo-  
372 electron tomograms. *Nat. Methods* **14**, 983-985, doi:10.1038/nmeth.4405 (2017).

373 46 Rohou, A. & Grigorieff, N. CTFFIND4: Fast and accurate defocus estimation from electron  
374 micrographs. *J. Struct. Biol.* **192**, 216-221, doi:https://doi.org/10.1016/j.jsb.2015.08.008  
375 (2015).

376 47 Nicastro, D. *et al.* The molecular architecture of axonemes revealed by cryoelectron  
377 tomography. *Science* **313**, 944-948, doi:10.1126/science.1128618 (2006).

378 48 Liljeroos, L., Krzyzaniak, M. A., Helenius, A. & Butcher, S. J. Architecture of respiratory  
379 syncytial virus revealed by electron cryotomography. *Proc Natl Acad Sci USA* **110**, 11133,  
380 doi:10.1073/pnas.1309070110 (2013).

381 49 McLellan Jason, S. *et al.* Structure of RSV Fusion Glycoprotein Trimer Bound to a  
382 Prefusion-Specific Neutralizing Antibody. *Science* **340**, 1113-1117,  
383 doi:10.1126/science.1234914 (2013).  
384 50 Pettersen, E. F. *et al.* UCSF Chimera--a visualization system for exploratory research and  
385 analysis. *J Comput Chem* **25**, 1605-1612, doi:10.1002/jcc.20084 (2004).  
386  
387



388 **Methods.**

389 **Cell lines and cell culture.** HeLa cells (ATCC CCL-2, ATCC, Manassas, VA, USA) and  
390 A549 cells (ATCC, CCL-185) were cultured and maintained in supplemented DMEM  
391 complete medium and BEAS-2B cells (ATCC, CRL-9609) cultured in supplemented  
392 RPMI-1640 complete medium as reported previously<sup>26</sup>. Primary *Drosophila melanogaster*  
393 third-instar larval neurons (the strain *elaV-Gal4, UAS-CD8::GFP* maintained and kindly  
394 provided by the Wildonger lab, UCSD) were extracted, cultured in supplemented  
395 Schneider's media, and maintained on micropatterned grids as previously described<sup>34</sup>.

396

397 **Cell seeding, infection and *in-situ* labeling on TEM grids.** Cell seeding on the TEM  
398 grids was performed following previous reports<sup>26</sup>. Briefly, Quantifoil grids (200 mesh Au  
399 R2/2 carbon or SiO<sub>2</sub> film; Quantifoil Micro Tools GmbH, Großlobbichau, Germany) were  
400 coated with extra carbon (5 to 8 nm) and glow discharged (10 mA, 60 sec). HeLa and  
401 BEAS-2B cells were trypsinized and seeded at a density of 0.7 X 10<sup>5</sup> cells/mL, followed  
402 by an overnight incubation prior to subsequent applications. For montage cryo-ET and  
403 correlative cryo-FLM-montage-ET, HeLa and BEAS-2B cells on the grids were infected  
404 with the recombinant virus strain RSV rA2-mK<sup>+</sup> at an optimized multiplicity of infection  
405 (M.O.I.) of 10 for 24 hours at 37 °C and 5 % CO<sub>2</sub>, as determined previously<sup>26</sup>. For cryo-  
406 focused ion beam milling (FIB-milling), A549 cells were digested and seeded at a density  
407 of 0.3 X 10<sup>5</sup> cells/mL on SiO<sub>2</sub> Au Quantifoil grids for 16 to 24 hours.

408

409 **Micropatterning and neuron cell culture on TEM grids.** Micropatterning and culturing  
410 of primary *Drosophila* larval neurons was performed as described<sup>30</sup>. Briefly, the extra

411 carbon coated gold Quantifoil grids (200 mesh, R 1.2/20, holey carbon film; Quantifoil  
412 Micro Tools GmbH, Großlöbichau, Germany) were glow-discharged, and coated with  
413 0.05% poly-L-Lysine (PLL). The grids were then functionalized by applying a layer of anti-  
414 fouling polyethylene glycol-succinimidyl valerate (PEG-SVA), followed by application of a  
415 photocatalyst reagent, 4-benzoylbenzyl-trimethylammonium chloride (PLPP) gel.  
416 Maskless photopatterning was performed to ablate the anti-fouling layer in defined  
417 patterns with a UV laser ( $\lambda = 375$  nm, at a dose of 30 mJ/mm<sup>2</sup>) using an Alvéole PRIMO  
418 micropatterning system. Adherent extracellular matrix (ECM) protein, fluorescently-  
419 labeled concanavalin A, Alexa Fluor™ 350 conjugate (emission,  $\lambda = 457$  nm, 0.5 mg/mL  
420 in water or PBS, ThermoFisher Scientific), was then added to promote the cellular  
421 adhesion and growth of primary *Drosophila* larval neurons isolated and cultured according  
422 to established protocols<sup>34,35</sup>. These neurons had pan-neuronal GFP expression  
423 (emission,  $\lambda = 525$  nm) on the membrane (CD8-GFP) to allow for tracking using live-cell  
424 wide-field fluorescent microscopy imaging. Neurons on patterned grids grew for a  
425 minimum of 48-72 hours for neurite growth prior to plunge freezing.

426

427 **Vitrification.** For EM grids prepared for non-FIB cryo-ET applications, 4  $\mu$ l of 10 nm BSA-  
428 treated gold fiducial beads (Aurion Gold Nanoparticles, Electron Microscopy Sciences,  
429 PA, USA) were applied before vitrification. The grids were plunge-frozen using either a  
430 Gatan CryoPlunge3 system (CP3) with GentleBlot blotters (Gatan, Inc., Pleasanton, CA,  
431 USA) or a Leica EM GP (Leica Microsystems). The Gatan CP3 system was operated at  
432 75 ~ 80 % humidity and a blot time of 4.5 to 5.5 s for double-sided blotting and plunge  
433 freezing. The Leica EM GP plunger was set to 25 °C to 37 °C, 99% humidity and blot

434 times of 6 s for R 1.2/20 micropatterned carbon-foil grids, and 15 s for R2/2 SiO<sub>2</sub> foil grids  
435 for single-sided blotting and plunge freezing. Plunge-frozen grids were then clipped and  
436 stored in cryo-grid boxes under liquid nitrogen.

437

438 **Correlative live-cell and cryogenic fluorescent microscopy.** Healthy A549 or RSV-  
439 infected HeLa cells were stained with MitoTrackerGreen FM (M7514, ThermoFisher  
440 Scientific, 100 nM, 30 min at 37 °C and 5 % CO<sub>2</sub>), washed, and stained with Hoechst-  
441 33342 (H3570, ThermoFisher Scientific, 1 to 1000 dilution, 20 min at 37 °C and 5 % CO<sub>2</sub>)  
442 to visualize mitochondria and the nucleus. As reported previously<sup>8</sup>, live-cell wide-field  
443 imaging (20 X, 0.4NA lens, dry) and cryo-FLM (50 X, ceramic-tipped, 0.9NA lens) on  
444 vitrified samples were performed on a Leica DMI8 and Leica EM Cryo-CLEM THUNDER  
445 system, respectively. The brightfield and band pass filter cubes of GFP (emission,  $\lambda$  =  
446 525 nm), DAPI (emission,  $\lambda$  = 477 nm), Texas Red (emission,  $\lambda$  = 619 nm), and Y5  
447 (emission,  $\lambda$  = 660 nm) were used. Live-cell wide-field images were collected as a grid  
448 montage at 20X. For cryo-FLM, Z-stack projections of 12 to 15  $\mu$ m for each channel were  
449 collected on the vitrified sample at a Nyquist sampling step of 350 nm using the Leica  
450 LAS X software. Small Volume Computational Clearance (SVCC) from the Leica LAS X  
451 THUNDER package was applied for fluorescent image deconvolution and blurring  
452 reduction on the cryo-FLM image stacks. All images and mosaics were exported and used  
453 as LZW compressed lossless 16-bit TIFF format. The on-the-fly cryo-FLM to cryo-ET  
454 correlation and data collection was performed using CorRelator<sup>24</sup>. Grids that were imaged  
455 under cryogenic conditions were saved and stored in in cryo-grid boxes under liquid  
456 nitrogen.

457

458 **3D targeted Cryo-FIB-SEM.** Low toxic nanoparticles of 40 nm (FluoSpheres, carboxylate  
459 modified microsphere, dark red fluorescent (660/680 nm), ThermoFisher Scientific,  
460 F8789) were introduced to cells seeded on the grid for an incubation of 2 hours at 2  
461 mg/mL, followed by washing with 1X PBS and 5 min incubation of 5 ~10 % glycerol as a  
462 cryoprotectant to properly vitrify cells. Afterwards, 4  $\mu$ l of diluted 200 nm FluoSpheres (1  
463 to 200 dilution, dark red fluorescent (660/670 nm), ThermoFisher Scientific, F8807) were  
464 applied to the grid in the humidity chamber of the Leica EM GP plunger prior to the  
465 vitrification step. Following Leica EM Cryo CLEM THUNDER imaging, clipped grids were  
466 transferred into a dual-beam (SEM/FIB) Aquilos2 cryo-FIB microscope (ThermoFisher  
467 Scientific) operating under cryogenic conditions. To improve the sample conductivity and  
468 reduce the curtaining artifacts during FIB milling, the grid was first sputter-coated with  
469 platinum (10 mA, 15 to 30 sec), and then coated with organometallic platinum using the  
470 in-chamber gas injection system (GIS, 6 sec with a measured deposition rate of 600  
471 nm/sec). A 2D affine transformation on the XY plane was performed to align cryo-FLM  
472 and cryo-scanning electron microscopy (SEM) grid mosaics on a rough micron scale and  
473 to further correlate square images from two modalities on a fine nanometer scale  
474 precision using hole centroids or 200 nm FluoSpheres in CorRelator. The eucentric height  
475 of the region of interest on the cryo-shuttle inside the dual-beam microscope and a  
476 shallow FIB-milling angle of 8 to 12° were determined. 2D SEM and FIB views of the  
477 squares (with the field of view large enough to include sufficient external microspheres  
478 and features as registration points) that contained the region of interest (ROI) were  
479 collected at the eucentric height and milling angle. 3D coordinate transform between the

480 3D Z-stack of the Y5 channel (nanoparticles, emission  $\lambda = 680$  nm) and the 2D FIB view  
481 was conducted through the optimized rigid body 3D transformation algorithm available in  
482 the 3DCT package using external 200 nm FluoSpheres ( $n = 4$  to 10) as registration  
483 points<sup>36</sup>. The transformed coordinates (X, Y, Z) were then imported into CorRelator to fine  
484 tune the deviations in X and Y coordinates introduced by the Z transformation in 3DCT,  
485 using the closed-form best-fitting least-square solution. The FIB milling boxes were  
486 positioned based on the prediction in the 2D FIB view in CorRelator<sup>24</sup>. The ion-beam  
487 milling process was performed using 0.3 nA for rough milling and gradually decreased  
488 currents of 0.1 nA, 50 pA, 30 pA, and 10 pA, following previously established protocols<sup>37</sup>.  
489 Without changing the sample/shuttle position during the milling, a series of cryo-SEM  
490 images (electron beam set at 2 kV, 25 pA, dwell time of 1  $\mu$ s) were collected as the lamella  
491 was thinned from an initial thickness of 5  $\mu$ m, 3  $\mu$ m, 1  $\mu$ m, to 800 nm, 500 nm and to the  
492 final 200 nm. The SEM images were used to: 1) check the milling process related to stage  
493 drift, lamella bending, etc., 2) adjust the milling positions by visualizing the density of  
494 internalized 40 nm nanoparticles on the lamella and comparing their positions (X, Y in  
495  $\sim$ 100 to 200 nm deviation error, and 500 nm in Z relative to the ROI ) in the correlated  
496 FLM Z-stack, and 3) to confirm the successfully milled isolated region houses the ROI.  
497 On-the-fly monitoring of nanoparticle presence provided quick and movement-free  
498 feedback on 3D targeted milling when an integrated FLM system is not available. It could  
499 also help eliminate excessive alignment steps introduced by shuttle moving in an  
500 integrated FLM and FIB-SEM system when the sample is moved back and forth between  
501 the FLM imaging and FIB-SEM positions<sup>38</sup>.

502

503 To further confirm the preservation of an ROI in the lamella, lamella were transferred to  
504 the Leica EM Cryo-CLEM THUNDER system and a Z-stack of the same channels was  
505 collected. Post-correlations on lamella of cryo-FLM, cryo-SEM, and cryo-EM were  
506 performed using angle-corrected neighboring signals around the lamella to transform  
507 cryo-FLM signals to corresponding features on the lamella under cryo-SEM and cryo-EM  
508 as described previously<sup>28</sup>.

509

510 **Cryo-electron tomography and reconstructions.** After live-cell FLM, cryo-FLM  
511 imaging, and/or cryo-FIB milling, the same clipped frozen grids were imaged using a Titan  
512 Krios (ThermoFisher Scientific, Hillsboro, OR, USA) at 300 kV. Images were acquired on  
513 a Gatan Bioquantum GIF-K3 camera in EFTEM mode using a 20 eV slit. Images were  
514 captured at various magnifications of 81x (4485 Å/pixel) for whole grid mosaic collection,  
515 470x (399 Å/pixel) and 1950x (177.6 Å/pixel) for square or whole lamella overview, 6500x  
516 (27.4 Å/pixel) for intermediate magnification imaging where the field of view is suitable for  
517 reliable tracking and 40 nm nanoparticles are visibly distinguished, and 19500x (4.603  
518 Å/pixel) for data acquisition using the SerialEM software package<sup>19</sup>. The full frame size of  
519 5760 x 4092 pixels (counting, CDS mode at 10 eps of dose rate) was collected.

520

521 *Montage cryo-ET setup in SerialEM.* Regular image-shift montage acquisition and the  
522 multiple record function in SerialEM were adapted for implementation of overlapped  
523 beam-image shift tiling. Benchmarks were done at a data acquisition magnification (pixel  
524 size of 4.603 Å/pixel) typical for cryo-ET. The illuminated area of 3.1 μm in diameter on  
525 the sample was determined by the beam size on the camera and the lens magnification.

526 Fresh gains were collected with this beam size (3.1  $\mu\text{m}$ ) and the gain normalized image  
527 over vacuum was low pass filtered to 50  $\text{\AA}$  to enhance the signal of Fresnel fringe peaks.  
528 Based on the behaviors of Fresnel fringes<sup>39</sup> and EM Gaussian signal distribution, the  
529 intensity value of the image over pixel was fitted into two distribution curves, a Poisson  
530 curve (maximum likelihood estimate/peak  $\lambda$ ) to fit the edge areas considered as “signal  
531 peaks” using 20% of X and Y dimension extending from the edge towards the center, and  
532 a Gaussian curve ( $\mu \pm 2\sigma$ ) to fit the center area considered as noise/background using  
533 90% of whole X and Y dimension from the center towards the edge with a 10% overlap  
534 with the “edge” area in MatLab (*poissfit* and *gaussianFit* Curve Fitting Toolbox,  
535 MathWorks, Natick, MA, USA). The cut-off from “signal” to “noise” were determined as  
536 the possibility of “signal” peaks fading into  $\mu \pm 2\sigma$  of “noise” distribution. From multiple  
537 measurements ( $n \geq 3$ ) along the circular beam edge, the cut-off was 3.5 ~4 % of X  
538 extending from the edge and insignificant in the Y direction. Thus, the rest of the image  
539 was considered as a fringeless FOV. Over a wide range of samples, we selected the pixel  
540 overlaps of 15% to 20% in the fringe-affected X-direction and 10% in the fringe-free Y-  
541 direction as the optimal tiling strategy, such that the usable field of view per camera frame  
542 was maximized after correction of Fresnel fringes and optimization of the pre-exposed  
543 area outside of camera frame FOV. A regular montage with minimum dimensions of 2X2  
544 was collected with the designated overlaps in X and Y at the data acquisition  
545 magnification. A rigorous and reliable image shift calibration in SerialEM at the data  
546 acquisition magnification was performed and repeated to ensure a more accurate shift.  
547 The beam-image shift tiling information (ImageShift entry under each item section in the  
548 image metadata file “.mdoc” file) was obtained on-the-fly. The shift in the X direction to

549 achieve the frame overlap of 15 % in X was retrieved by calculating the difference in  
550 image shift between the tile 1 (PieceCoordinates of 0 0 0) and tile 3 (PieceCoordinates of  
551 4608 0 0). The shift in the y direction to achieve the frame overlap of 10 % overlap in Y  
552 was retrieved by calculating the difference between tile 1 (PieceCoordinates of 0 0 0) and  
553 tile 2 (PieceCoordinates of 0 3516 0). The MultishotParams (X/Y component of image  
554 shift vector) was subsequently modified to reflect the tile montage image shift and saved  
555 under the SerialEM setting file.

556

557 *Montage cryo-tilt series collection in SerialEM.* A SerialEM macro (available at  
558 <https://github.com/wright-cemrc-projects/cryoet-montage>) was used to implement the  
559 montage tilt series by acquiring overlapping tiles with designated overlaps to form a  
560 montage at each tilt with an additional translational shift and or rotation shift to distribute  
561 the dose. Autofocusing was performed at each tilt and shifted along the orientation of the  
562 tilt axis 500 nm plus the maximum translational shift of the center of montage tile pattern  
563 (e.g. 0.8  $\mu\text{m}$ , Supplementary Figs. 9a) away from the edge of the montage tile pattern.  
564 The total dose per tile tilt series was 30-40% below the maximum dose the sample was  
565 able to tolerate before evidence of punctate bubbles. At the beginning of each grouped  
566 tilt, high magnification/data acquisition tracking with a threshold of 5% of the FOV to  
567 acquire a new tracking reference and to iterate the alignment until the threshold was met  
568 (usually within one or two iterations), using the nearby autofocusing area, was performed.  
569 An additional lower intermediate magnification tracking on a larger FOV of the region of  
570 interest was implemented when the tilt angles were above 30°, with a threshold of a  
571 difference greater than 10% (usually within one or two iterations). The tilt series collection



572 was paused when the iterations for convergence exceeded 5 times. Benchmarks were  
573 done using a 3X3 or 3X4 montage tile pattern and a dose-symmetric scheme running at  
574  $\pm 51^\circ$  with  $3^\circ$  increments, groups of 3 tilts (original “Hagen scheme” is group of 1 tilt) and  
575 a dose of  $2 \text{ e}^-/\text{\AA}^2/\text{tile}$  per tilt for RSV-infected BEAS-2B and HeLa cells, and neurons on  
576 micropatterned grids, while a dose of  $1.42 \text{ e}^-/\text{\AA}^2/\text{tile}$  per tilt for A549 cell lamella based on  
577 the dose tolerance measurements of each sample. The CDS counting mode and dose  
578 rate of 10 eps were used on a K3 camera. The translational shift off-sets followed the  
579 global spiral displacement ( $A_{\text{final}} = 1.5$ , Period = 3, Turns = 50, Revolutions = 15 as input  
580 parameters to control the spiral size and resulting displacement offsets). The speed of  
581 collection varied with the size of the montage tile, the type of microscope, detector used  
582 and sample-dependent total dose. Benchmark collections were 60 min on average and  
583 rendered 9 sub-tilt series (3X3 tile pattern) that were stitched seamlessly to form one  
584 montaged tilt series. Translational spiral off-sets and collection schemes (bidirectional,  
585 dose-symmetric, defocus, etc.) can be adjusted accordingly in the SerialEM macro. The  
586 SerialEM macro can be modified to adjust translational spiral off-sets and collection  
587 schemes (bidirectional, dose-symmetric, defocus, etc.). The macro can be integrated into  
588 existing common automated data collection schemes using the function *Navigator*  
589 *Acquire at points* in SerialEM<sup>40</sup>.

590

591 *Montage tilt series processing.* All movie frames per acquisition ( $0.1\sim 0.2 \text{ e}^-/\text{\AA}^2/\text{frame}$ )  
592 were aligned and corrected using MotionCor2<sup>41</sup>. For montage tilt series, the total tiles per  
593 tilt were registered and stitched together using the designated beam coordinates supplied  
594 to the microscope as described above and with linear cross-correlation methods<sup>42</sup>.

595 Despite the fringes on the edge, intrinsic low contrast and low dose received by cryo-tilt  
596 series, the regularity of the montage tiling pattern and sufficient overlaps with optimized  
597 tiling strategy consistently provided robust and automated seamless stitching without user  
598 intervention up to  $\pm 39^\circ$ . Manual image alignment (MIDAS), implemented in the IMOD  
599 package<sup>42</sup>, was used to adjust piece coordinates and iteratively cross-correlate adjacent  
600 tiles at higher tilts when necessary. Fully stitched montage tilt series were binned by 2.  
601 Tilt series alignment and tomographic reconstructions were performed using the IMOD  
602 package with a final pixel size of 9.206 Å. In the absence of gold fiducials in the FIB-milled  
603 lamella, alignment of the tilt series was performed using patch tracking or internalized  
604 nanoparticles as tracking markers. CTF correction using ctfplotter and ctfphaseflip and  
605 dose-weighted filtering<sup>43</sup> were applied to the aligned tilt series prior to tomogram  
606 reconstruction. For segmentation, the aligned tilt series were further binned 3X (final pixel  
607 size of 27.6 Å, binned 6X) prior to the tomogram reconstruction. Tomograms were either  
608 processed using fast edge-enhancing denoising algorithm based on anisotropic nonlinear  
609 diffusion implemented in TomoEED<sup>44</sup> or Gaussian low-pass filtered to 80 Å for  
610 visualization and segmentation. Tomograms of stitched montage tilt series (final pixel size  
611 of 27.6 Å) were annotated using convolutional neural networks implemented in the  
612 EMAN2 package<sup>45</sup>. For the sub-tilt series, motion-corrected frames were sorted to  
613 generate individual tile tilt series that were CTF estimated using CTFFIND4<sup>46</sup>. Tilt series  
614 that contained one or more inadequate projections (not properly tracked or failed CTF  
615 estimation) were discarded. Qualified sub-tilt series were then aligned, CTF corrected  
616 with ctfplotter and ctfphaseflip, dose-weighted filtered, binned to 2X (a final pixel size of  
617 9.206 Å), and reconstructed into tomograms, similar to stitched montage tilt series

618 implemented in the IMOD package. Python or bash scripts (available at  
619 <https://github.com/wright-cemrc-projects/cryoet-montage>) were used to automate the  
620 movie frame alignment, montage tile stitching, sub-tilt and montage tilt generation.

621

622 **Sub-tomogram averaging.** For proof of concept, all averaging was done on unfiltered  
623 sub-tilt tomograms using PEET 1.15.0<sup>47</sup>, following the steps reported previously<sup>33</sup>.  
624 Particles were manually picked from low pass filtered sub-tilt tomograms binned 2X to a  
625 final pixel size of 9.206 Å. Initial particle orientation and rotation axes of particles were  
626 generated using Spikelnit (PEET). An initial alignment was done with 565 particles from  
627 one tomogram using post-fusion F glycoprotein (EMDB-2393)<sup>48</sup> low pass filtered to 60 Å  
628 as the initial reference. The final average from this first run was low pass filtered to 60 Å  
629 and used as the initial reference for a second run on 12,435 particles from a total of 12  
630 sub-tilt tomograms, with a soft-edged cylinder mask applied during the alignment.  
631 Duplicate particles were removed during each iteration with a tolerance of 73.6 Å (8  
632 voxels). An additional iteration was done with refined particles using a smaller search  
633 range and a larger mask with softer edges. The final average from the second run  
634 suggested a three-fold symmetry, consistent with reported crystal structures<sup>49</sup>. C3  
635 symmetry was imposed using *modifyMotiveList* in PEET to generate a three-fold  
636 symmetric data set. The C3 symmetric data set was aligned and averaged using the final  
637 average from the second run, low-pass filtered to 60 Å as the initial reference for  
638 refinement with a smaller search range. The final sub-tomogram average (final pixel size  
639 of 9.26 Å, binned 2X) from the C3 symmetry expanded particles was reconstructed from  
640 23,259 particles. The final density map of F was low pass filtered to 29.53 Å based on the

641 FSC cutoff of 0.5 that was calculated in PEET. The picked particles that were in the  
642 stitched area (15% in X and 10% in Y) were removed and the rest were reprocessed  
643 following the same steps. The final sub-tomogram average (final pixel size of 9.26 Å,  
644 binned 2X) from the C3 symmetry expanded particles was reconstructed from 20,707  
645 particles. The final density map of F was low pass filtered to 27 Å based on the FSC cutoff  
646 of 0.5 calculated in PEET. The atomic crystal model of pre-fusion F trimer (PDB: 4JHW)<sup>49</sup>  
647 was fitted in the filtered electron density map in Chimera<sup>50</sup>.

648

#### 649 **TomoGrapher development.**

650 Simulations of the tiled montage imaging and electron beam exposures on a sample were  
651 developed as a collection of C# classes built on the Unity 3D engine (version  
652 2020.3.20f1). The simulation represents an array of M x N x O volumes called voxels as  
653 a sample interacted by an electron beam. The canvas “stage” comprises of 150 x 150  
654 voxels (X = Y = 150, Z = 1, total extent of 10 x 10 x 0.2 μm) with the center butterfly ROI  
655 spanning across 5 x 4 μm on the imaging XY plane. An interactive GUI describes  
656 parameters of the imaging including sampling pixel spacing, illuminated area of the beam  
657 on the camera, the tiling pattern of the beam, tilt ranges, and translations defined by spiral  
658 offsets. A complete run of a simulation iterates through each tilt increment across the  
659 range, and ray traces from a sampling position of the illuminated area in the direction of  
660 the beam to find intersections on the stage of voxel volumes. Voxels intersected by the  
661 rays are aggregated in a set, and each voxel in the set has its total dose incremented  
662 once per beam. The viewer provides a real-time animation of the beam shifts, tilting of

663 the stage, and overall exposure at each voxel. TomoGrapher release versions and source  
664 code are available at <https://github.com/wright-cemrc-projects/cryoet-montage> .

665

666 **Statistics and Reproducibility.** Experiments performed in Figs. 1b-e, 2a-b,  
667 Supplementary Figs. 2, 3b-c, 6, 8, 9 were performed independently three times with  
668 similar results. Experiments from Figs. 1f, 2c-f, were performed in duplicates, resulting in  
669 7 montaged tilt series on FIB lamellas from two lamellas on two different grids and 13  
670 montaged tilt series on two different micropatterned neuron grids.

671 **Figures and Legends**

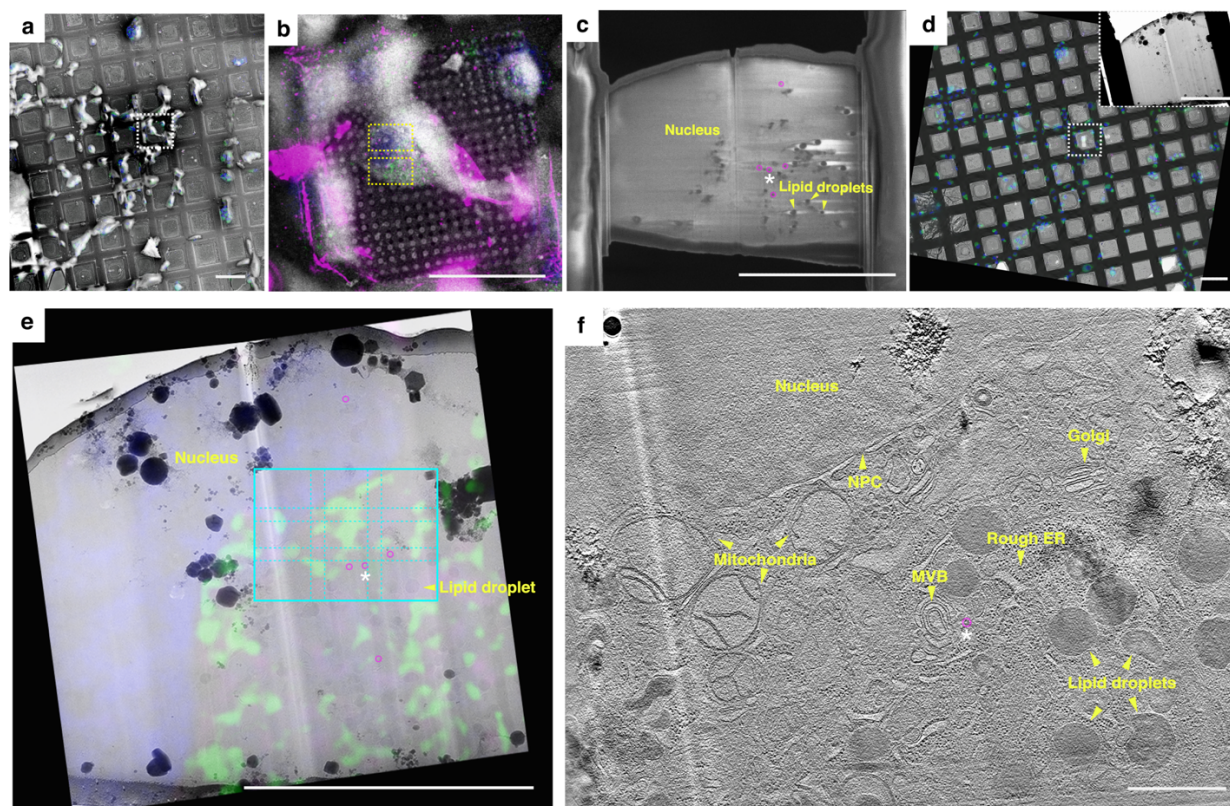

672  
673  
674  
675  
676  
677  
678  
679  
680  
681  
682  
683  
684  
685  
686  
687  
688  
689  
690  
691  
692

**Fig. 1. Correlative cryo-FLM, cryo-FIB-SEM, and montage cryo-ET of a cryo-lamella from an A549 cell to visualize the in-situ architecture of the nucleus, mitochondria, and other organelles.** **a.** Correlation of cryo-SEM and cryo-FLM grid mosaics to identify an A549 cell in the square of interest (white box). Scale bar, 100  $\mu\text{m}$ . **b.** Cryo-FIB-milling boxes (pair of dashed yellow boxes) positioned to target the nucleus (blue) and mitochondria (green) in an A549 cell (white box in **a**), with internalized fluorescent beads (40 nm, pink) as milling “fiducials” for on-the-fly 3D targeted correlation. **c.** Cryo-SEM of the 200 nm thick lamella. Nucleus, lipid droplets, and internalized fluorescent beads (pink circles) are noted. Scale bars, 10  $\mu\text{m}$  in **b** and **c**. **d.** Correlation of pre-FIB-milled cryo-FLM and post-FIB-milled cryo-TEM grid mosaics (Inset, cryo-TEM image of the lamella at higher magnification). Scale bars, 100  $\mu\text{m}$  in **d**, 10  $\mu\text{m}$  in inset of **d**. **e.** Post correlation overlay of the 2D cryo-EM image of the lamella with the corresponding Z section from the pre-FIB-milled cryo-FLM stack. A 3x3 tiling for montage cryo-ET (cyan, 6.8 x 5.3  $\mu\text{m}$  at a pixel size of 4.603  $\text{\AA}$ ) at the ROI. Scale bar, 10  $\mu\text{m}$ . The same internalized fluorescent beads as in **c** (pink circles) are noted. **f.** Tomographic slice, ~45 nm thick (binned 2x tomogram at a pixel size of 9.206  $\text{\AA}$ ), through the 3X3 montaged cellular tomogram (cyan ROI in **e**). Nucleus, nuclear pore complex (NPC), mitochondria, Golgi apparatus, rough ER, multivesicular bodies (MVB) are noted. Scale bar 1  $\mu\text{m}$ . The same internalized fluorescent bead (pink circled) as in **c**, **e**, **f** was noted by the asterisk (white).

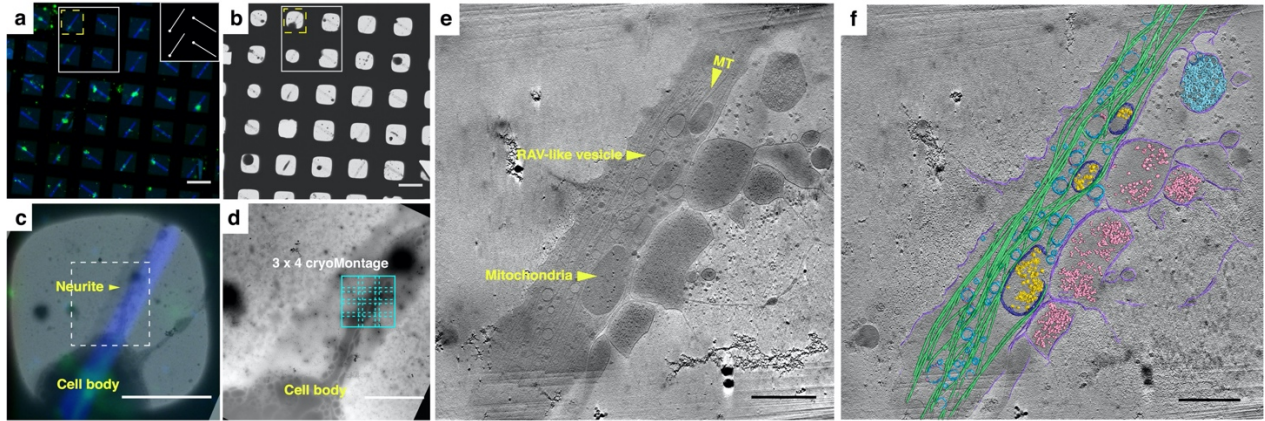

693  
694  
695  
696  
697  
698  
699  
700  
701  
702  
703  
704  
705  
706  
707  
708  
709

**Fig. 2. Correlative live-cell-FLM and montage cryo-ET of primary *Drosophila melanogaster* neurons on a mask-free micropatterned cryo-TEM grid.** **a-b.** Live-cell FLM (**a**) and cryo-EM (**b**) grid maps of membrane GFP-labeled primary neurons (green) cultured on a gold-mesh, holey (R1.2/20) carbon film micropatterned with a straight-line pattern (inset in **a**) across the grid and coated with fluorescent concanavalin A (blue) to control the growth of neurites. Scale bars, 100  $\mu\text{m}$ . **c.** Overlay of correlated FLM-cryo-EM image of the square highlighted in yellow in **a** and **b**. **d.** Enlarged cryo-EM image of the dashed white boxed region in **c**. A 3X3 tiling for montage cryo-ET (cyan, 6.8 x 5.3  $\mu\text{m}$  at a pixel size of 4.603  $\text{\AA}$ ) on the region of interest (ROI) extending from the cell body. Scale bars, 50  $\mu\text{m}$  in **c**, 10  $\mu\text{m}$  in **d**. **e-f.** Tomographic slice of  $\sim 45$  nm thick (binned 2x tomogram at pixel size of 9.206  $\text{\AA}$ ), reconstructed from the 3X3 montage tilt series at the ROI (**e**) and the corresponding segmentation (**f**). The structured organization of microtubules (MT, green) and the arrangement of surrounding cellular organelles, including mitochondria (dark blue with calcium granules (yellow)), ribosomes (light pink) and ribosome-associated-like vesicles (darker cyan) are noted. Scale bars, 1  $\mu\text{m}$ .

710  
711  
712  
713  
714  
715  
716  
717  
718  
719

## 720 Supplementary Figures and Legends

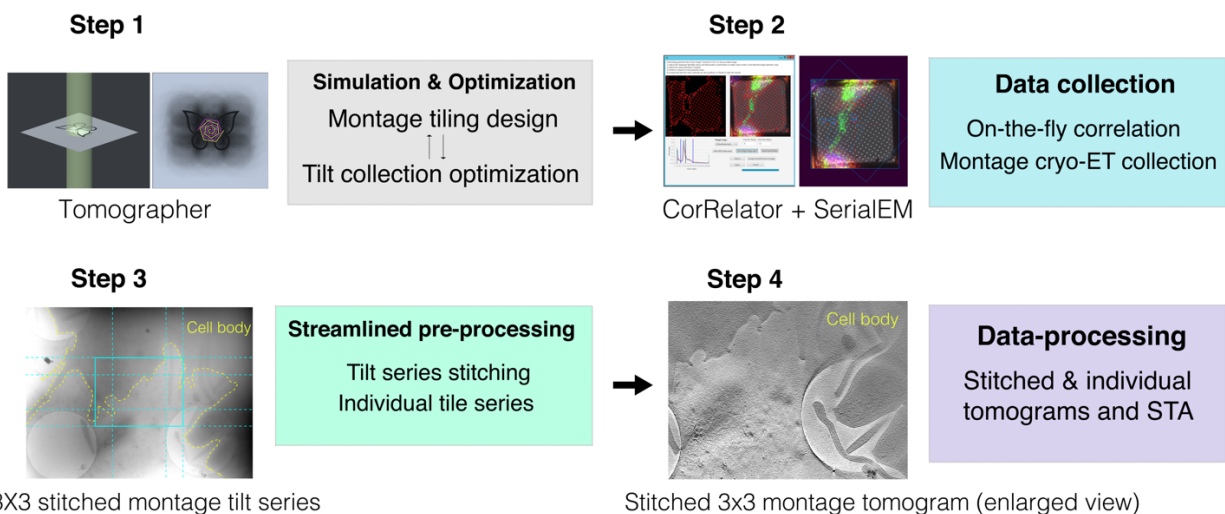

721 3X3 stitched montage tilt series

722  
723  
724  
725  
726  
727  
728  
729  
730  
731  
732  
733  
734  
735  
736  
737  
738  
739  
740  
Stitched 3x3 montage tomogram (enlarged view)

**Supplementary Figure 1. Correlative montage cryo-electron tomography workflow.** The correlative montage cryo-electron tomography (cryo-ET) workflow follows four main steps: **Step 1.** *TomoGrapher* simulation-guided tiling design and optimization of tiling patterns for cryo-ET data collection. **Step 2.** CorRelator-driven 2D and 3D cryo-correlation for high-accuracy targeting to support cryogenic tilt series collection with SerialEM. **Step 3.** Automated pre-processing to sort individual tiles and sub-tilt series, and stitch full montages concurrently with data collection. **Step 4.** Analyses including sub-tomogram averaging (STA) and segmentation may be conducted on both individual and stitched montage tomograms.



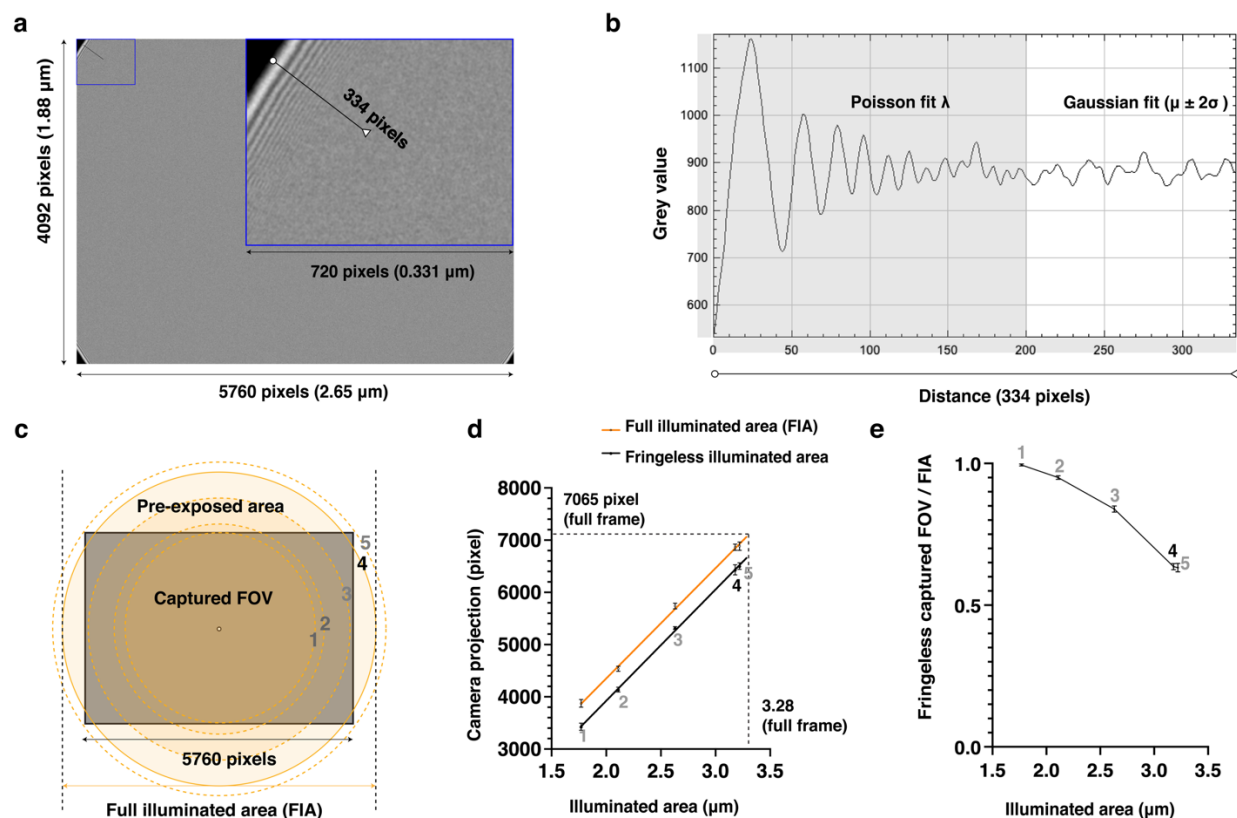

741  
742  
743  
744  
745  
746  
747  
748  
749  
750  
751  
752  
753  
754  
755  
756  
757  
758  
759  
760  
761  
762  
763  
764  
765  
766  
767

**Supplementary Figure 2. Optimization of beam size and tiling strategy on a triple-condenser lens transmission electron microscope.** Benchmarking of the montage cryo-ET workflow was done on a standard Titan Krios 300 kV microscope system with a K3 camera (5760 X 4092 pixels) at a pixel size of 4.603 Å, C2 aperture of 100 mm, and defocus of -5 μm. **a.** Fresnel fringes extending over the illuminated area (beam size 3.11 μm). **Inset:** Enlargement of the boxed fringe-containing area, low pass filtered to 50 Å. **b.** Radial intensity profile along the black line in the **Inset** of **(a)**. The region visibly impacted by the Fresnel fringes was determined to extend from the beam edge to ~200 pixels (grey area) towards the center of the image, affecting between 3.5 to 4 % of the outer edge of a tile. Based on the Fresnel fringes' Poisson behavior and TEM signal's gaussian distribution, the fringe peak intensities were fit to a Poisson curve (maximum likelihood estimate/peak  $\lambda$ ), considered as "signal" and the fringeless illuminated area was fit to a gaussian function ( $\mu \pm 2\sigma$ ) as "noise" in MatLab (*poissfit* and *gaussianFit* Curve Fitting Toolbox). The cut-off from "signal" to "noise" were determined as the possibility of "signal" peaks fading into  $\mu \pm 2\sigma$  of "noise" distribution, from multiple measurements ( $n \geq 3$ ) along the circular beam edge. **c-e.** Optimization of beam size (1 to 5, beam sizes increase) in consideration of the full illuminated area (FIA), fringeless illuminated area, pre-exposed area, and captured field of view (FOV) at the constant benchmark magnification and defocus. **c.** The camera FOV (rectangle) and projected beam size (circles) extending outside viewable area. **d.** Linear relationships between illuminated areas on a triple-condenser lens Titan Krios system, defined as the electron beam projected onto the sample, and the beam projected size on the camera plane (orange line, orange circles in **c**,  $r^2 = 0.9989$ ), and the associated fringeless illuminated area (black line,  $r^2 = 0.9995$ ). **e.** The ratio of fringeless FOV captured on the camera over the full illuminated area (FIA). Overall, beam size 4 (3.11 μm) achieved reasonable fringeless illumination without wasting electron dose on unimaged yet illuminated sample area, and used for benchmark montage cryo-ET in the paper.

768

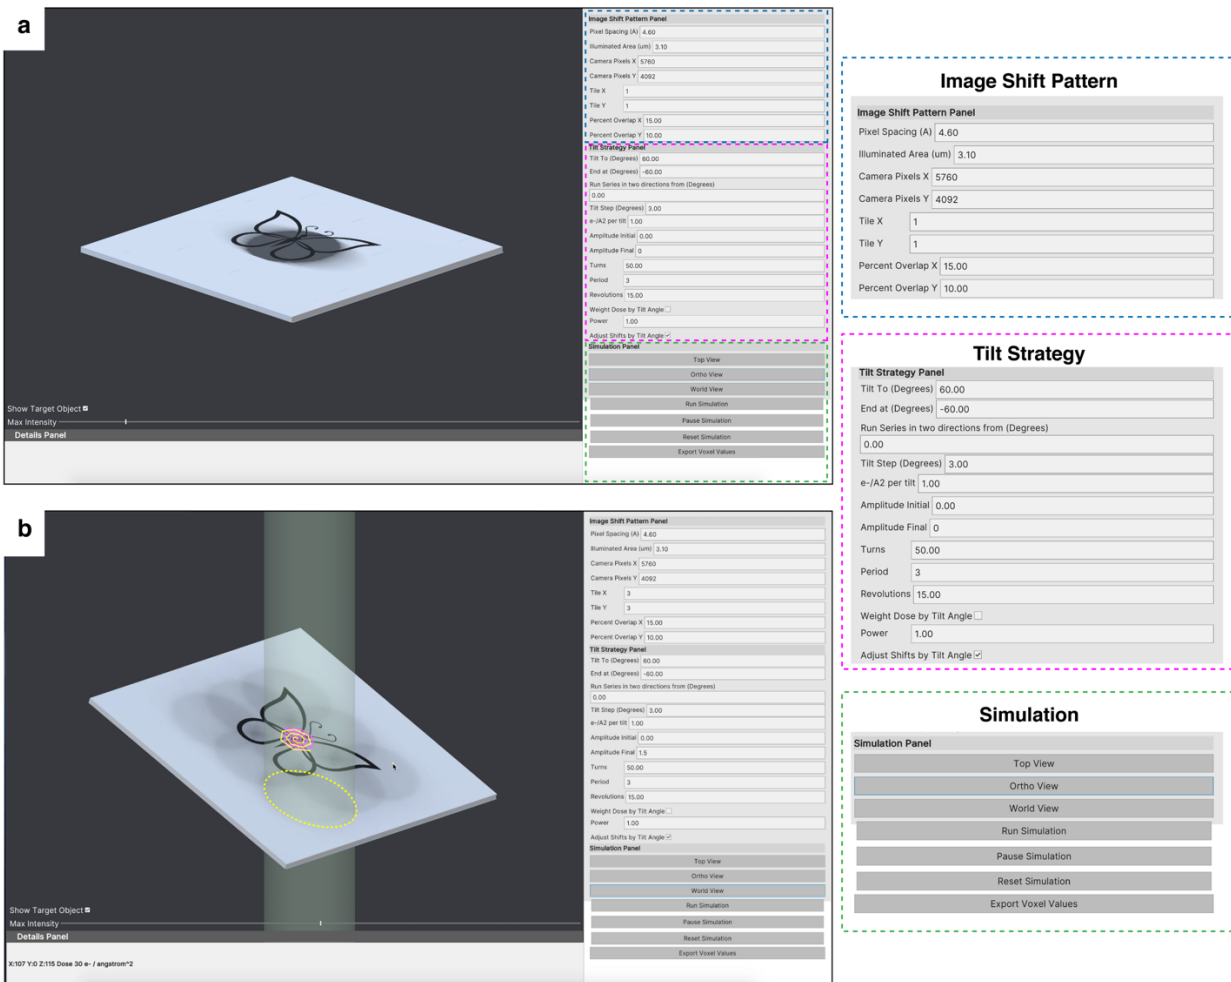

769

770

771 **Supplementary Figure 3. Simulation of tilt series collection in TomoGrapher GUI.**

772 *TomoGrapher* is a simulation tool providing a full 3D visualization of (a) single-shot and (b)

773 montaged (e.g., 3X3 tile) tilt series collection. A stage comprised of 150 x 150 x 1 voxels with a

774 target region of interest (ROI, butterfly, butterfly, 5  $\mu\text{m}$  x 4  $\mu\text{m}$  x 0.2  $\mu\text{m}$ ) shows the beam position

775 and accumulated dose values at each position of the total exposed area. The “Image Shift Pattern

776 Panel” (blue boxed) provides parameters to adjust the pixel size, illuminated area (beam size),

777 camera dimensions, and number of and percent overlap for the montage tiles. The “Tilt Strategy

778 Panel” (magenta boxed) controls the tilt range, directionality, tilt step increment, dose per tilt, the

779 amplitudes and geometries of the spiral translational shifts during a tilt series, and provides

780 updated preview images of simulation parameters. Varying intensity as 1/cosine of tilt angle to a

781 certain power is a selectable option to *Weight Dose by Tilt Angle*. Scaling the X-axis shift offset

782 by the cosine of the tilt angle can also be enabled with *Adjust Shifts by Tilt Angle* where the Y-

783 axis is aligned as the tilt axis. The “Simulation Panel” (green boxed) has buttons to change the

784 viewing angle, start a simulation, and export data.

785

786

787

788

789

**No offsets**

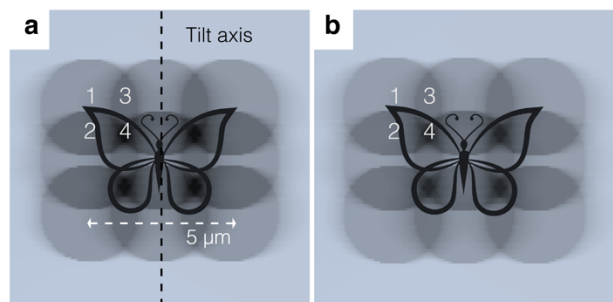

**Translations without x-axial compensation**

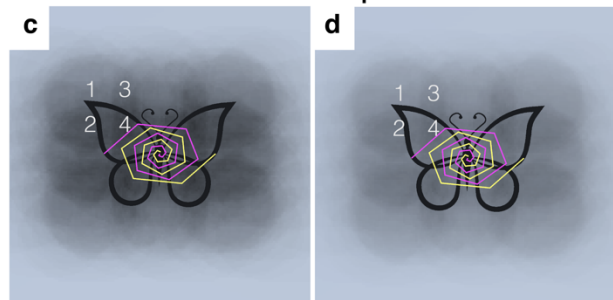

**Translations with x-axial compensation**

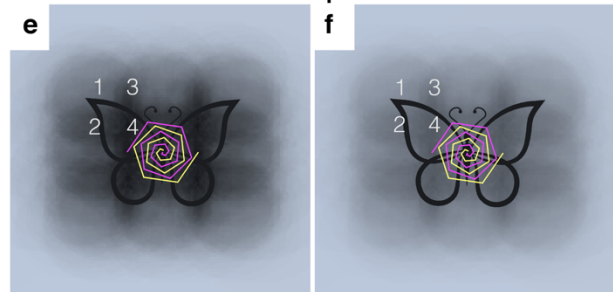

**g Translation with no x-axial scaling correction**

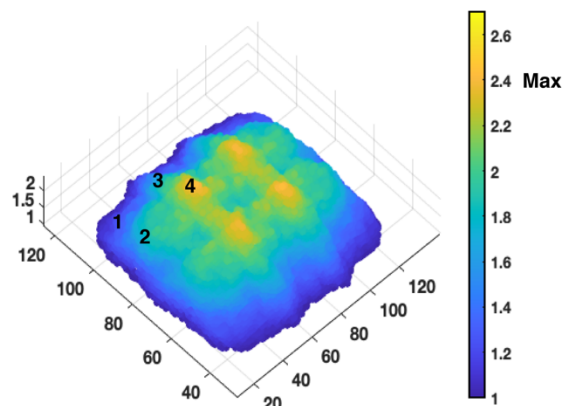

**h Translation with x-axial scaling correction**

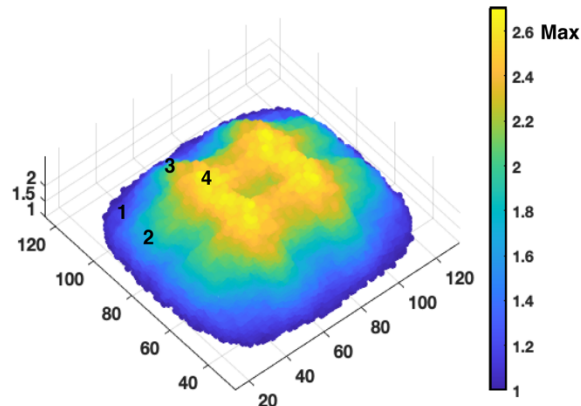

789  
790  
791  
792  
793  
794  
795  
796  
797  
798  
799  
800  
801  
802  
803  
804  
805  
806  
807  
808  
809

**Supplementary Figure 4. Optimization of montage tiling translational shift for dose distribution in TomoGrapher.** Simulated spatial distribution of dose accumulation in six montage tilt series collection schemes (3X3 tile pattern, pixel size of  $4.603 \text{ \AA}$ , beam size of  $3.1 \mu\text{m}$ , from  $-51^\circ$  to  $51^\circ$  tilts with a  $3^\circ$  increment, the butterfly as ROI), with no translational offsets (**a, b**), spiral translational offsets (**c, d**), and the spiral translational shift with an optional scaling factor (cosine of tilt angle) to reduce  $x$ -axis shifts at higher tilt angles (**e, f**). Values provided for dose are  $1 \text{ e}^-/\text{\AA}^2$  per tile per tilt in (**a, c, d**) and  $0.7 \text{ e}^-/\text{\AA}^2$  per tile per tilt in (**b, d, f**). The accumulated dose at four areas (10 voxels pivoting around the central 1 to 4 points) were compared between the six collection schemes, detailed in **Supplementary Table 1**. The spiral shift pattern is delineated in pink ( $0^\circ$  to  $51^\circ$ ) and yellow ( $-51^\circ$  to  $0^\circ$ ) in (**c-f**) where the same global translational offset is applied ( $A_{\text{final}} = 2.5$ , Period = 3, Turns = 50, Revolutions = 15). **g-h**. Visualization of the dose distribution received by voxels of the ROI butterfly during the tilt series schemes applied in the benchmarking experiments ( $A_{\text{final}} = 1.5$ , Period = 3, Turns = 50, Revolutions = 15). The simulated dose values ( $\text{e}^-/\text{\AA}^2/\text{voxel}$ ) were exported and plotted in MatLab to show the normalized distribution against the average dose of corresponding tiles from the no translational shift scheme. The same 1-4 center points are marked. The maximum (Max) normalized change is  $\sim 2.4$ -fold in (**g**) and  $\sim 2.6$ -fold in (**h**) with the axial scaling compensation. Height and color of each voxel correspond to its accumulated dose. No axial scaling compensation introduces larger shifts and more dose distribution due to the elliptical projection, but the scaling compensation distributes the dose more evenly.

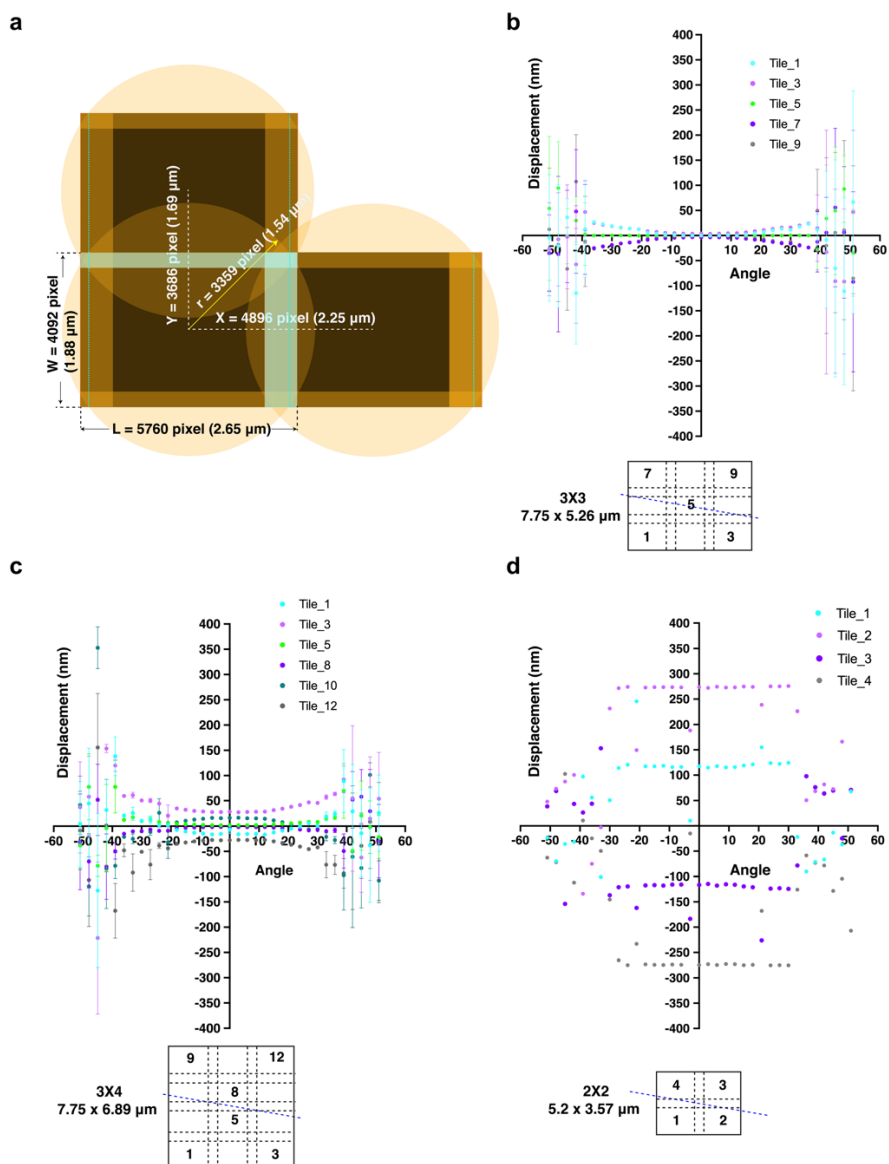

810  
811  
812  
813  
814  
815  
816  
817  
818  
819  
820  
821  
822  
823  
824  
825

**Supplementary Figure 5. Optimization of the tiling montage cryo-ET tilt series collection with global shift offsets to distribute the electron dose.** **a.** Strategy for placement of beam tiles (fringeless usable camera FOV / FIA = 0.7) with 15% to 20% in X (Fresnel fringe-affected) and 10% in Y in a square or rectangular array after balancing fringes, pre-exposed area and the ratio of fringeless captured FOV over FIA. Higher overlap in X supports gap-free stitching under low-dose conditions. **b-d.** Shift displacement of individual tiles (blue dotted line notes the tilt axis) of tilt series collected using the benchmark imaging condition on a Titan Krios 300kV (pixel size of 4.603 Å, C2 aperture of 100 mm, defocus of  $-5 \mu\text{m}$ , tilt range of  $-51^\circ$  to  $51^\circ$ ,  $3^\circ$  increment, dose symmetric scheme with group of 3 tilt angles per switch) with application of an additional translation-only (3X3 in **b** and 3X4 in **c**, maximum global translational offsets of  $0.8 \mu\text{m}$ ,  $n = 8$ ) or translation plus an additional  $20^\circ$  per tilt rotation offset (total rotation of 35 tilts  $\times 20^\circ = 700^\circ$ ) in (**d**,  $n = 1$ ) for dose distribution. **d.** Representative plot of tile displacement for a montage tilt series including both translational and rotational shifts which introduce much larger displacements that reduce the effectiveness of automated montage stitching routines. The benchmark spiral

826 parameters ( $A_{\text{final}} = 1.5$ , Period = 3, Turns = 50, Revolutions = 15) resulted in a  $\sim 0.8 \mu\text{m}$  maximum  
827 translational offset.

828

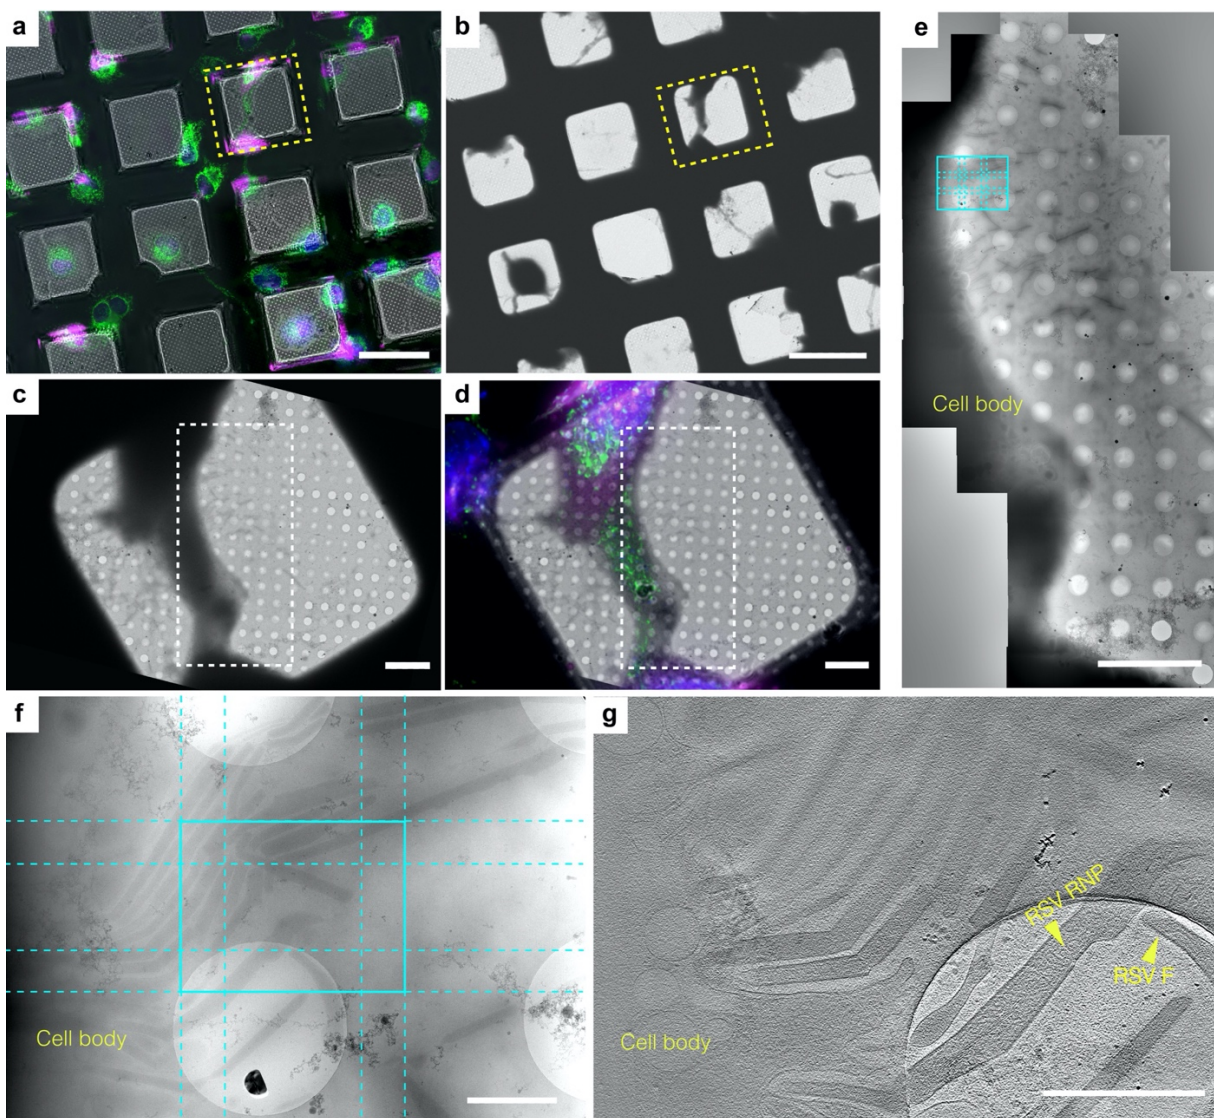

829

830

831

832

833

834

835

836

837

838

839

840

841

842

843

844

845

**Supplementary Figure 6. Large field of view of budding RSV virions captured by a correlative cryo-FLM montage cryo-ET workflow.** Cryo-FLM (a) and cryo-EM (b) grid image montages of RSV-infected HeLa cells (magenta) grown on a SiO<sub>2</sub> filmed R2/2 gold-mesh grid. Mitochondria (green) and nucleus (blue) are labeled. Square of interest highlighted in yellow. Scale bars, 100  $\mu$ m. c. Magnified cryo-EM view of the yellow square in (b). d. On-the-fly CorRelator-based cryo-FLM and cryo-EM 2D correlation (yellow square in a, b) for the ROI identification where montage tilt series were collected in SerialEM. Scale bars, 10  $\mu$ m. e. Magnified cryo-EM image montage of the white boxed area in (d). A 3X3 tiling for montage cryo-ET at the ROI (cyan tile pattern) where mitochondrion accumulate and RSV actively bud from the cell plasma membrane. Scale bars, 10  $\mu$ m. f. Montage cryo-ET tiles at 0° tilt (cyan, 6.8 x 5.3  $\mu$ m at pixel size of 4.603 Å). Scale bar, 1  $\mu$ m. g. Tomographic slice, ~20 nm thick, through the 3X3 montaged tomogram (cyan ROI in e, f). RSV particles with clearly resolved fusion F glycoproteins and ribonucleoprotein (RNP) complexes are present at budding sites along the cell body. Scale bar, 1  $\mu$ m.

### Step 1 Cell culture & bead internalization

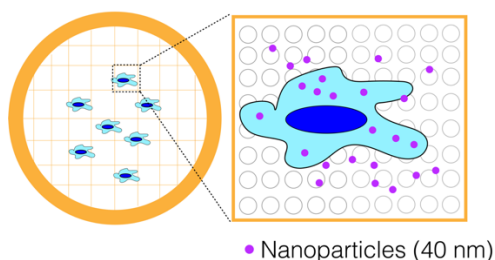

### Step 2 Freezing & cryo-FLM imaging

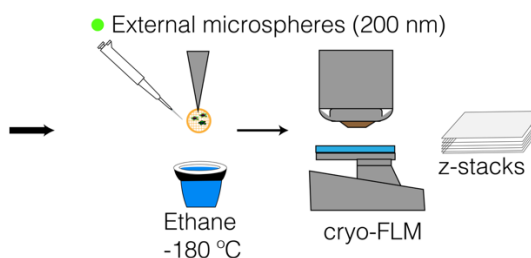

### Step 3 On-the-fly 3D targeted FIB milling

cryo-SEM 2D-xy and 3D-z FIB/SEM-FLM correlation

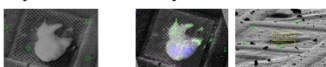

Registration: external microspheres in CorRelator

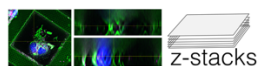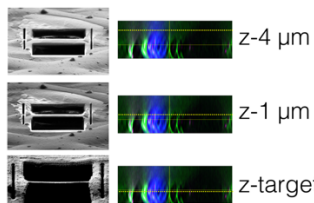

On-the-fly monitor: internalized nanoparticles

### Step 4 Post-FIB cryo-FLM & cryo-ET

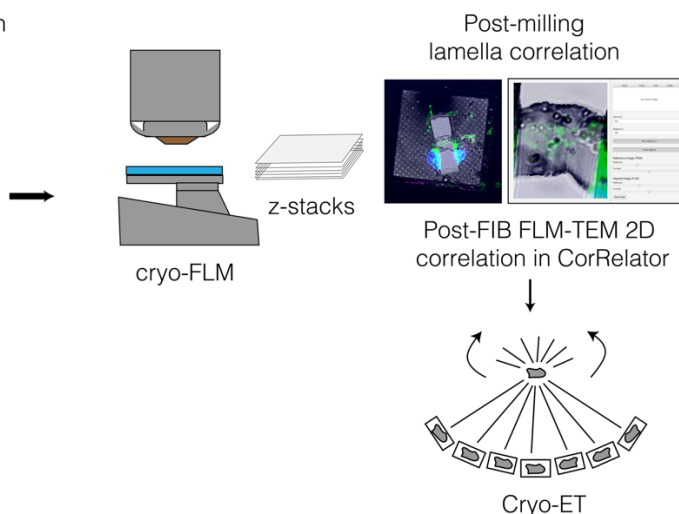

846

847

848

849

850

851

852

853

854

855

856

857

858

859

860

861

862

863

864

865

866

**Supplementary Figure 7. Correlative 3D cryo-FLM-FIB-ET workflow.** Overview of the correlative 3D cryo-FLM-FIB-ET workflow using two fiducial markers: 200 nm external fluorescent microspheres for coarse alignment and registration and cell-internalized 40 nm nanoparticles for on-the-fly 3D correlation during cryo-FIB milling. **Step 1.** Fluorescent nanoparticles (40 nm, pink) incubated with cultured cells were internalized. **Step 2.** Fluorescent microspheres (200 nm) were added prior to plunge freezing and grids were then imaged under a cryo-FLM system to acquire Z-stacks of regions of interest (ROIs). **Step 3.** The same grid was loaded onto and imaged with a dual-beam cryo-FIB-SEM system. Using the 3DCT Toolkit and CorRelator, cryo-FLM Z-stacks and 2D cryo-SEM and cryo-FIB images of ROIs were correlated for milling using 200-nm microspheres (FIB view, green circles) in X, Y, and Z. The placement of the milling boxes was refined based on the relative positions of the nanoparticles (pink) and signal of interest (green). **Step 4.** The same FIB-milled lamella was returned to the cryo-FLM system to acquire a new Z-stack cryo-FLM images for post-FIB-milling correlation. The lamella was then loaded into a cryo-TEM system. CorRelator-directed correlation between cryo-FLM and TEM images of the lamella was performed, and montage or regular tilt series were collected with SerialEM.

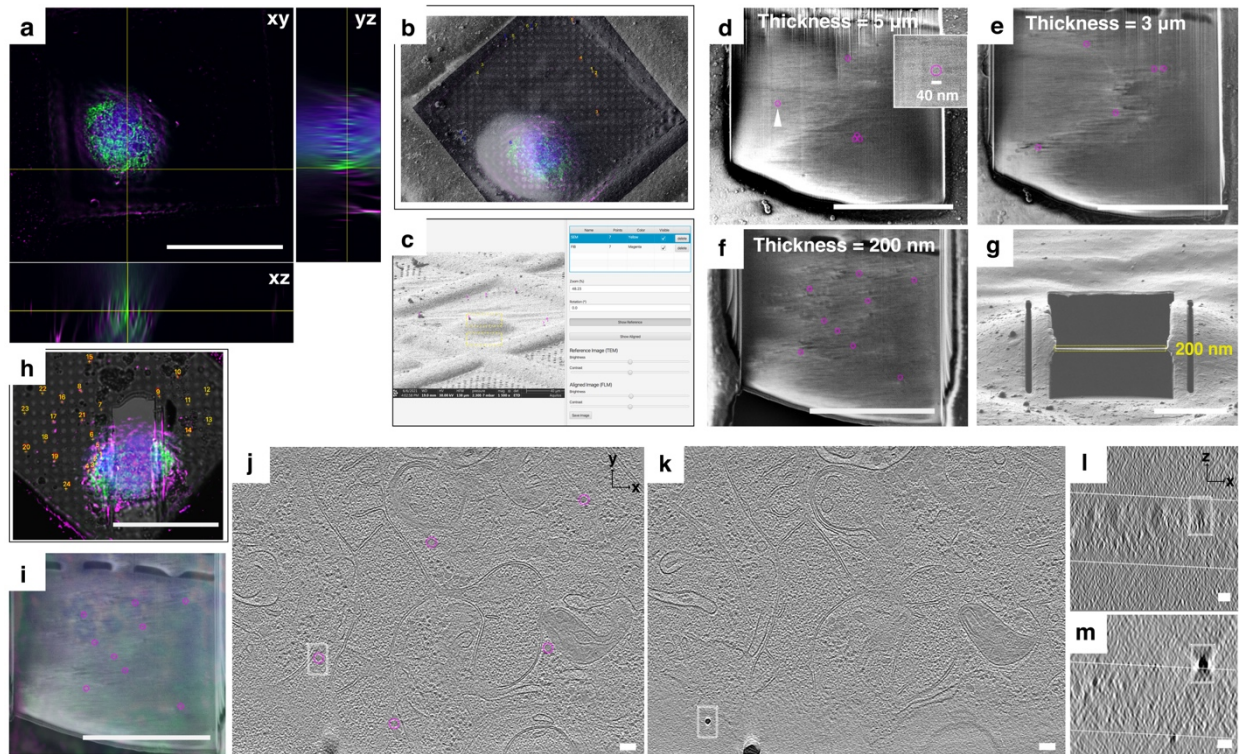

867  
868

869 **Supplementary Figure 8. 3D correlation using internalized low-toxic fluorescent beads as**  
870 **fiducial markers in cryo-FIB-SEM. a.** Orthogonal merged deconvoluted fluorescent cryo-FLM  
871 (NA = 0.96) projections of labeled mitochondria (green), nucleus (blue), and internalized  
872 nanoparticle (pink) inside the HeLa cell. Scale bar, 100  $\mu\text{m}$ . **b-h.** On-the-fly 3D targeted FIB-milling  
873 delineated in the Step 3 in Supplementary Figure 6. The X-Y plane correlation is done in  
874 CorRelator (**b**) and initial X-Z correlation to position milling boxes in Z (yellow boxes) done in  
875 3DCT and CorRelator (**c**). Nanoparticle intensity visible under cryo-SEM as the lamella milling  
876 progresses from a thickness of 5  $\mu\text{m}$  (**d**) to 3  $\mu\text{m}$  (**e**), to the final 200 nm (**f**, **g**), highlighted by pink  
877 circles (40 nm in diameter). A representative nanoparticle in (**d**) was pointed out by white triangle  
878 and enlarged in the inset. **h-i.** 3D cryo-FLM post-correlation of the post-FIB lamella and pre-FIB  
879 corresponding fluorescent section in CorRelator. The corresponding nanoparticles in (**f**) are  
880 highlighted in pink circles. Scale bars, 10  $\mu\text{m}$  in (**d-g**) and (**i**), 50  $\mu\text{m}$  in (**h**). Red and yellow  
881 numbers in the GUI screenshots of (**b**, **c**, **h**) are registration points used in CorRelator. **j-m.**  
882 Representative X-Y tomographic slices (thickness of 20 nm, pixel size of 4.603  $\text{\AA}$ ) displaying the  
883 nanoparticles (pink circle, **j**) and similar sized non-nanoparticle intensity (white boxed, **k**), and  
884 their corresponding X-Z projections (**l-m**) of white boxed area in (**j**) and (**k**). The tomogram Z-  
885 volume boundaries are indicated by white dashed lines in (**l-m**). Scale bars, 50 nm in (**j-m**).  
886 Nanoparticles are less electron dense than ice particles or regular gold fiducials.

887

888

889

890



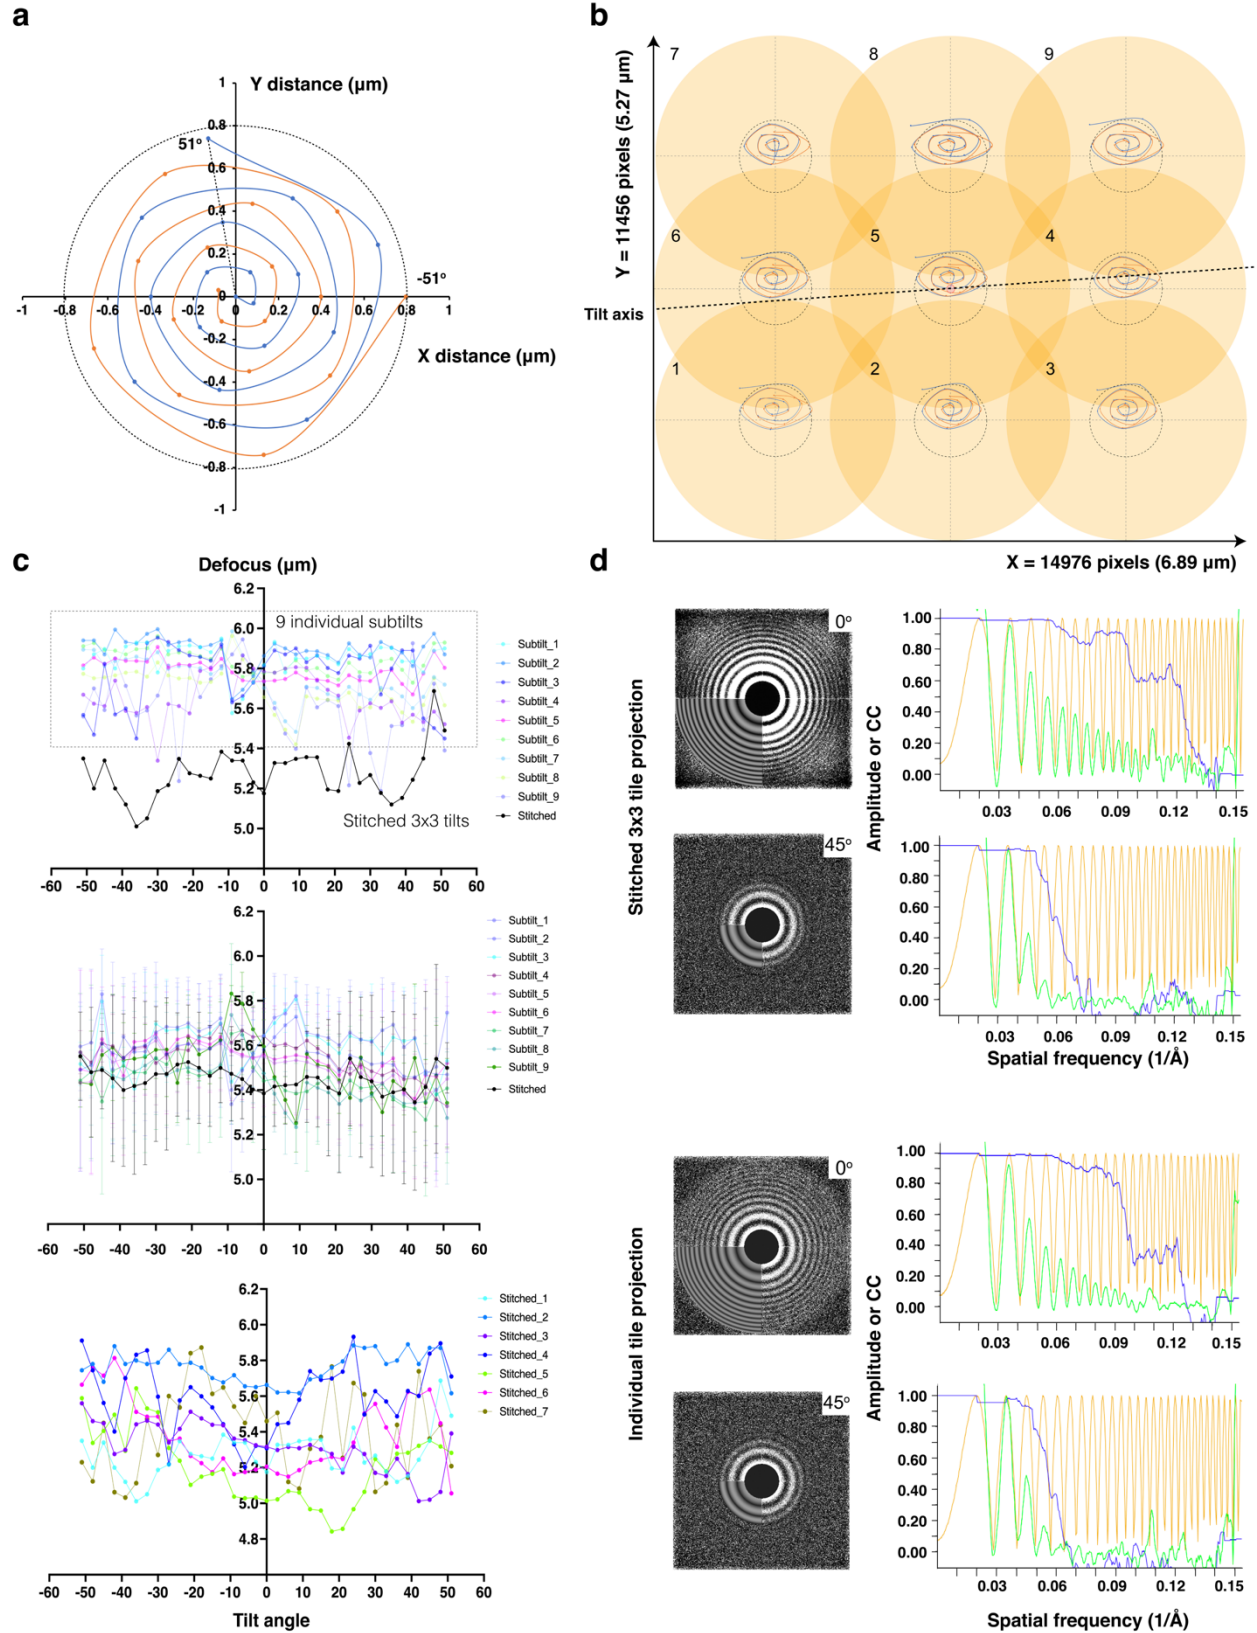

891

892

893 **Supplementary Figure 9. Defocus determination and CTF estimation of full stitched**  
894 **montage and individual tile tilt series. a.** Benchmark spiral translation pattern applied to  
895 distribute electron dose. To introduce global translation offsets, the central tile of the montage  
896 follows spiral paths shifting outwards over the full course of the tilt series from  $-51^\circ$  (orange points)  
897 to  $51^\circ$  (blue points) in a dose-symmetric, three-degree increment and group of 3 scheme. The  
898 translation maximum is  $0.8 \mu m$  (black dotted circle,  $A_{\text{final}} = 1.5$ , Period = 3, Revolution = 15 as  
899 spiral shape parameters). **b.** Cross-correlation alignment of cosine-stretched image shifts at each  
900 tilt angle relative to  $0^\circ$  tilt in individual tile tilt series of the regular 3X3 montage pattern, using  
901 Tiltxcorr in IMOD. The image shift between each tilt follows a stretched spiral along the X axis  
902 when the optional scaling parameter of the translation is not applied. The image shifts of individual  
903 tile tilt series were overall within the maximum distance of  $0.8 \mu m$  (black dotted circle). Numbers  
904 indicate the individual tile positions applied to both **(c)** and **(d)**. **c.** Defocus values of nine individual  
905 tile sub-tilt series and the corresponding stitched 3X3 montage tilt series (pixel size of  $4.603 \text{ \AA}$ ),  
906 following the same global spiral shift in **(a, b)** were estimated using CTFPLOTTER in IMOD: one  
907 representative 3X3 stitched montage and nine individual tile tilt series (top), median variation at  
908 each tilt angle over multiple 3X3 montage and corresponding tile tilt series ( $n = 3$ , middle), and 7  
909 stitched montage tilt series (bottom) are shown. A target defocus of  $-5 \mu m$  was applied by  
910 performing autofocusing prior to the tile collection at each tilt angle, along the tilt axis,  $7.5 \mu m$   
911 away from the center of the montage tile to account for the size of the montage ( $6.89 \times 5.27 \mu m$ )  
912 and additional translation shift ( $0.8 \mu m$ ). **d.** CTF estimation in CTFFIND4 by the 2D power spectra  
913 (left) from projections at  $0^\circ$ ,  $45^\circ$ , and  $-45^\circ$  from a representative 3X3 stitched montage tilt series  
914 and one of the individual tile tilt series (tile position 2 in **b**), and corresponding fitted 1D models  
915 (right) showing radially averaged amplitude spectrum (green), CTF fit (orange), and CTF fit score  
916 (blue).

917  
918  
919  
920  
921  
922  
923  
924  
925

926

927

928

929

930

931

932

933

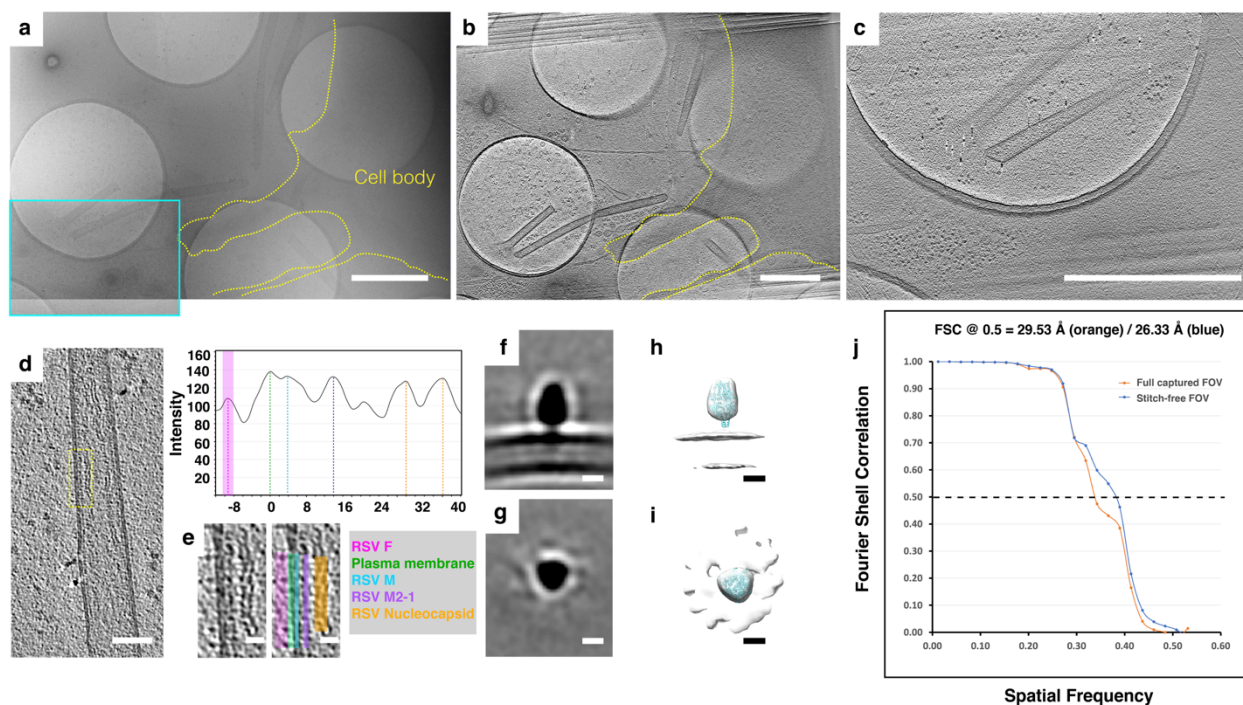

934  
935

936 **Supplementary Figure 10. Sub-tomogram averaging of individual tile tomograms.** **a**. 3X3  
937 montage cryo-ET image tiles at 0° tilt of RSV-infected BEAS-2B cells. The cell boundary is  
938 delineated in yellow and one tile with viruses used for sub-tomogram averaging is highlighted in  
939 cyan. **b**. Central slice of the stitched 3X3 montage tomogram in (a), cell boundary (yellow). **c**.  
940 Central ~18 nm slice of the reconstructed tomogram (pixel size of 9.206 Å) of the tile highlighted  
941 in (a, cyan box). Scale bars, 1 μm in a-c. **d**. Reoriented Z-projection (9 nm thick) of the virion from  
942 the tomogram in (c). **e**. An enlarged view of virus (yellow dashed box in d) with virion components  
943 noted in different colors and a linear density profile across the virion region. Scale bars, 100 nm  
944 in (d), 20 nm in (e). **f-i**. Sub-tomogram averages of RSV F from individual tile tomograms collected  
945 through the 3X3 montage cryo-ET workflow. The particles in overlapped stitched zones (15% in  
946 X and 10% in Y) were excluded. **f-g**. Slices from a sub-tomogram average of binned 2 individual  
947 tile tomograms (pixel size of 9.206 Å) of RSV F filtered to 27 Å in the side (f) and top (g) views.  
948 **h-i**. RSV pre-fusion trimer model (PDB: 4JHW, cyan) fit into an isosurface of the sub-tomogram  
949 average of F. Scale bars, 5 nm. **j**. FSC curves for sub-tomogram averages of F particles picked  
950 from full captured field of view (orange, C3 symmetry expansion, n = 23250) and field of view free  
951 from stitching overlaps (blue, C3 symmetry expansion, n = 20707) as stitch-free particles in sub-  
952 tilt tomograms.

953

954

|                                                                  | Position 1<br>(x/y, 38/101) | Position 2<br>(x/y, 45/87) | Position 3<br>(x/y, 59/103) | Position 4<br>(x/y, 58/87) |
|------------------------------------------------------------------|-----------------------------|----------------------------|-----------------------------|----------------------------|
| <b>No translation (a)</b>                                        | 39.2 ± 5.2                  | 85.1 ± 18.1                | 64.5 ± 7.7                  | 105.1 ± 18.5               |
| <b>No translation lower dose by 30% (b)</b>                      | 27.5 ± 3.6                  | 59.6 ± 12.5                | 45.2 ± 5.3                  | 73.6 ± 12.9                |
| <b>Translation (c)</b>                                           | 45.5 ± 3.2                  | 77.1 ± 4.8                 | 56.8 ± 7.4                  | 79.2 ± 10.1                |
| <b>Translation lower dose by 30% (d)</b>                         | 31.8 ± 2.2                  | 48.2 ± 3.3                 | 39.8 ± 5.2                  | 56.1 ± 7.1                 |
| <b>Translation with x-axial correction (e)</b>                   | 45.2 ± 4.8                  | 83.7 ± 10.8                | 66.7 ± 7.6                  | 94.7 ± 10.8                |
| <b>Translation with x-axial correction lower dose by 30% (f)</b> | 31.7 ± 3.4                  | 51.2 ± 7.6                 | 46.7 ± 5.3                  | 66.3 ± 7.5                 |

955

956 **Supplementary Table 1.** Dose accumulation in  $e^-/\text{\AA}^2/\text{voxel}$  at specified voxels in four sampling  
957 areas (radius of  $10 \times 10 \times 1 \text{ voxel}^2$  pivoting around the central sampling points 1 to 4, X and Y  
958 voxel positions specified, indicated in **Supplementary Fig. 4**) of six different collection schemes  
959 with the same 3X3 montage tile pattern using *TomoGrapher* simulation. The mean and standard  
960 deviation were calculated. The Tilt Strategy parameters is also specified in Supplementary Fig. 4  
961 (3X3 tile pattern, pixel size of  $4.603 \text{ \AA}$ , beam size of  $3.1 \mu\text{m}$ , from  $-51^\circ$  to  $51^\circ$  tilts with a  $3^\circ$   
962 increment, 1 or  $0.7 e^-/\text{\AA}^2$  per tile per tilt).  
963
